# Supplementary material for: Easy one-pot synthesis of multifunctionalized indole–pyrrole hybrids as a new class of antileishmanial agents
Source: Royal Society of Chemistry journal article supplement (doi:10.1039/d4ra02790f), 2024-01-01
Supplement: d4ra02790f1.pdf [file d4ra02790f1.pdf]

## ELECTRONIC SUPPORTING INFORMATION

---

# Easy one-pot synthesis of multifunctionalized indole-pyrrole hybrids as a new class of antileishmanial agents

Vittorio Ciccone,<sup>a†</sup> Aurora Diotallevi,<sup>a†</sup> Miriam Gómez-Benmansour,<sup>a</sup> Sara Maestrini,<sup>a</sup> Fabio Mantellini,<sup>a</sup> Giacomo Mari,<sup>a</sup> Luca Galluzzi,<sup>a</sup> Simone Lucarini,<sup>\*a</sup> and Gianfranco Favi<sup>\*a</sup>

<sup>a</sup>Department of Biomolecular Sciences, Section of Chemistry and Pharmaceutical Technologies,  
University of Urbino “Carlo Bo”, 61029 Urbino, Italy

<sup>†</sup>These authors contributed equally to this work

Email (SL): [simone.lucarini@uniurb.it](mailto:simone.lucarini@uniurb.it); Email (GF): [gianfranco.favi@uniurb.it](mailto:gianfranco.favi@uniurb.it)

# ELECTRONIC SUPPORTING INFORMATION

---

## Table of Contents

|                                                                                                                    |         |
|--------------------------------------------------------------------------------------------------------------------|---------|
| <b>1. General remarks</b>                                                                                          | S3      |
| <b>2. Synthesis and characterization of substrates</b>                                                             | S4      |
| 2.1 Procedure for the synthesis of substrates <b>1a–k</b>                                                          | S4      |
| 2.2 Procedure for the synthesis of substrates <b>2a,b</b>                                                          | S4      |
| <b>3. Synthesis and characterization of products</b>                                                               | S5–S9   |
| 3.1 Procedure for the synthesis of products <b>3a–k</b>                                                            | S5      |
| 3.3 Characterization of products                                                                                   | S5–S9   |
| <b>4. Synthetic transformations</b>                                                                                | S9–S11  |
| 5.1 Access to compound <b>4a</b>                                                                                   | S9–S10  |
| 5.2 Access to compound <b>5a</b>                                                                                   | S10–S11 |
| <b>5. <sup>1</sup>H and <sup>13</sup>C NMR spectra</b>                                                             | S12–S25 |
| <b>6. Viability evaluation of compounds <b>3c</b>, <b>3d</b> and <b>3j</b> on <i>L. infantum</i> promastigotes</b> | S26     |
| <b>7. Toxicity evaluation of compounds <b>3c</b>, <b>3d</b> and <b>3j</b> on THP-1 cells</b>                       | S27     |
| <b>8. References</b>                                                                                               | S28     |

## ELECTRONIC SUPPORTING INFORMATION

---

### 1. General Remarks

All the commercially available reagents and solvents were used without further purification. Indoles (**1a-k**), cyanoacetic acid (**A**) and acetic anhydride (**B**) were commercial materials; 3-Cyanoacetyl indoles (CAIs) **1a-k**<sup>[1]</sup> and 1,2-diaza-1,3-dienes (DDs) **2a,b**<sup>[2-4]</sup> were prepared according to literature procedures. Chromatographic purification of compounds was carried out on silica gel (60-200  $\mu\text{m}$ ). TLC analysis was performed on Merck silica gel plates (silica gel 60 F254); compounds were visualized by exposure to UV light and by dipping the plates in 1%  $\text{Ce}(\text{SO}_4)\cdot 4\text{H}_2\text{O}$ , 2.5%  $(\text{NH}_4)_6\text{Mo}_7\text{O}_{24}\cdot 4\text{H}_2\text{O}$  in 10% sulphuric acid followed by heating on a hot plate. All  $^1\text{H}$  NMR and  $^{13}\text{C}$  NMR spectra were recorded at 400 and 101 MHz, respectively, using  $\text{DMSO-}d_6$  or  $\text{CDCl}_3$  as solvent on a Bruker Ultrashield 400 spectrometer (Bruker, Billerica, MA, USA) and analyzed using TopSpin 1.3 (2013) software package. Chemical shifts ( $\delta$  scale) are reported in parts per million (ppm) relative to the central peak of the solvent and are sorted in descending order within each group. The following abbreviations are used to describe peak patterns where appropriate: s = singlet, d = doublet, dd = doublet of doublet, t = triplet, q = quartet, sept = septet, m = multiplet and br = broad signal. All coupling constants (J value) are given in Hertz [Hz]. High-resolution mass spectra were performed by slow direct infusion (5  $\mu\text{L}/\text{min}$ ) of  $\approx 0.1$   $\mu\text{g}/\text{mL}$  solution (acetonitrile/0.1% aqueous formic acid 1:1) of new compounds, using Orbitrap Exploris 240 mass spectrometer (Thermo Scientific, Waltham, MA, USA) equipped with an ESI source; only molecular ions  $[\text{M} + \text{H}]^+$  are given. Melting points were determined by Buchi (Gallen, Switzerland) B-540 in open capillary tubes and are uncorrected.

## 2. Synthesis of substrates

2.1. List of substrates **1a–k** and **2a,b** prepared according to the general procedures.<sup>[1],[2–4]</sup>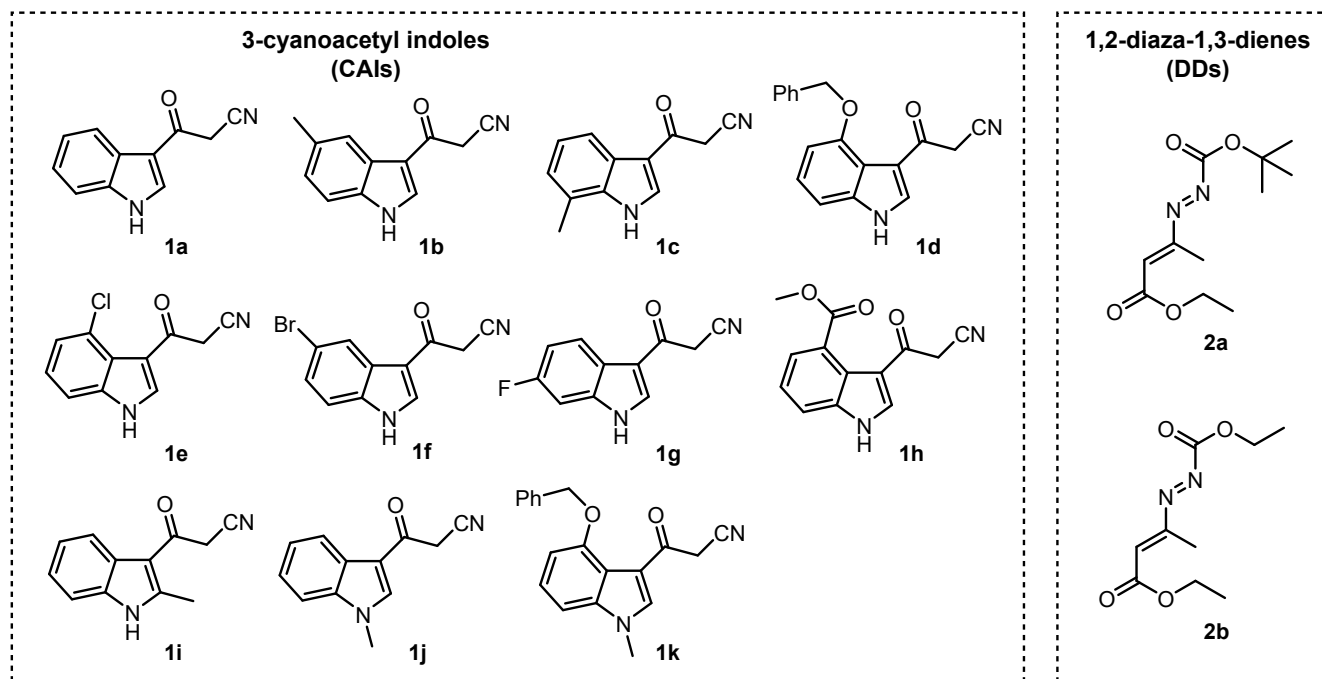2.2. Procedure for the synthesis of 3-cyanoacetyl indoles (CAIs) **1a–k**<sup>[1]</sup>:

A stirred solution of cyanoacetic acid (4.8 mmol, 1.2 equiv) and acetic anhydride (4 mL) was heated to 65 °C using an oil bath for 10 min. Then, corresponding indole (4 mmol, 1.0 equiv) was added to reaction mixture and heated to 85 °C. After completion of the reaction as monitored by TLC, the mixture was cooled to room temperature, and then in ice bath and the solid formed was collected, washed with methanol (5 mL) and dried to give desired compound **1**.

2.3. Procedure for the synthesis of 1,2-diaza-1,3-dienes (DDs) **2a,b**<sup>[2–4]</sup>:

Commercially available ethyl 2 chloroacetoacetate (5 mmol) was added to a magnetically stirred of ethyl or *tert*-butyl carbazate (5 mmol) in tetrahydrofuran (50 mL). The reaction was allowed to stand under magnetic stirring at room temperature until the disappearance of the reagents (monitored by TLC chromatography). The reaction solvent was then evaporated under reduced pressure, the crude  $\alpha$ -chloro-hydrazone was dissolved in ethyl acetate and treated with aqueous saturated solution of sodium carbonate (50 mL x 2) and then with an aqueous solution of sodium hydroxide (1%, 50 mL x 1). Ethyl acetate was evaporated under reduced pressure and the final 1,2-diaza-1,3-diene **2** were purified by chromatography on silica gel column.

## ELECTRONIC SUPPORTING INFORMATION

### 3. Synthesis and characterization of products

#### 3.1 General procedure for the one-pot two-step synthesis of indole-pyrrole hybrids **3a–l**

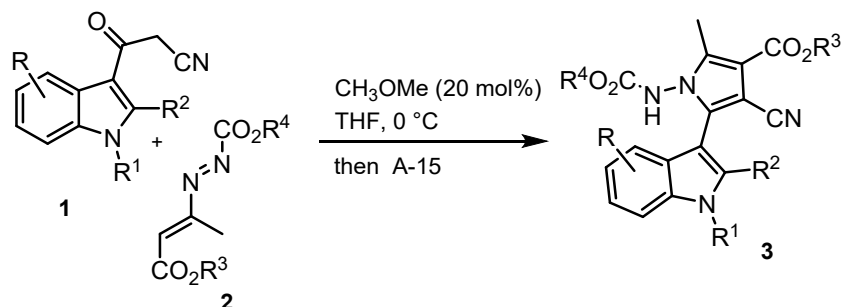

To a stirred solution of the 3-cyanoacetyl indole **1** (0.4 mmol) in THF (2 mL) in the presence of a catalytic amount of sodium methoxide (0.08 mmol) was added dropwise a solution of azoalkene **2** (0.4 mmol) in THF (2 mL) at 0 °C. The mixture was magnetically stirred at 0 °C until consumption of the starting material (TLC check). Once the Michael addition was completed (the formation of two isomers of adduct intermediate as major components was revealed by TLC), Amberlyst 15(H) (1.5 equiv.) was added, and the reaction was stirred for an additional 12 hours. After completion of the reaction (monitored by TLC), the resin was filtered off, washed with THF and the solvent was removed under reduced pressure. The crude residue was purified by silica gel column chromatography using cyclohexane and EtOAc as an eluent to obtain the corresponding product **3**.

#### 3.2 Characterization of products

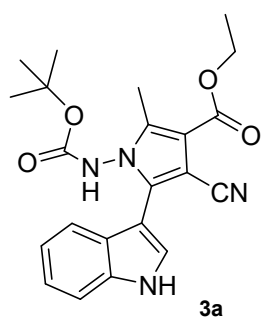

**Ethyl 1-((tert-butoxycarbonyl)amino)-4-cyano-5-(1H-indol-3-yl)-2-methyl-1H-pyrrole-3-carboxylate (3a):** compound **3a** was isolated by column chromatography (ethyl acetate/cyclohexane 30:70) in 89% yield (145.4 mg); white solid; mp: 188–190 °C; <sup>1</sup>H NMR (400 MHz, DMSO-*d*<sub>6</sub>) δ 11.73 (s, 1H), 10.56 (s, 1H), 7.53 (d, *J* = 2.8 Hz, 1H), 7.50 (d, *J* = 8.0 Hz, 2H), 7.20 (t, *J* = 7.6 Hz, 1H), 7.10 (t, *J* = 7.6 Hz, 1H), 4.30 (q, *J* = 7.2 Hz, 2H), 2.41 (s, 3H), 1.36 (s, 9H), 1.33 (t, *J* = 7.2 Hz, 3H); <sup>13</sup>C NMR (100 MHz, DMSO-*d*<sub>6</sub>) δ 162.8, 154.7, 139.0, 138.4, 136.3, 127.2, 126.0, 122.4, 120.3, 119.9, 116.0, 112.5, 110.2, 101.8, 90.4, 81.9, 60.5, 28.2, 14.5, 10.9; HRMS (ESI-Orbitrap, *m/z*): Calcd for C<sub>22</sub>H<sub>25</sub>N<sub>4</sub>O<sub>4</sub> [M+H]<sup>+</sup> 409.1870; Found 409.1882.

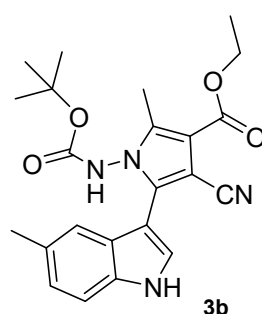

**Ethyl 1-((tert-butoxycarbonyl)amino)-4-cyano-2-methyl-5-(5-methyl-1H-indol-3-yl)-1H-pyrrole-3-carboxylate (3b):** compound **3b** was isolated by column chromatography (ethyl acetate/cyclohexane 35:65) in 41% yield (69.3 mg); white solid; mp: 182–184 °C; <sup>1</sup>H NMR (400 MHz, DMSO-*d*<sub>6</sub>) δ 11.58 (s, 1H),

## ELECTRONIC SUPPORTING INFORMATION

10.52 (s, 1H), 7.46 (d,  $J = 2.7$  Hz, 1H), 7.37 (d,  $J = 8.3$  Hz, 1H), 7.27 (s, 1H), 7.02 (dd,  $J = 8.3, 1.6$  Hz, 1H), 4.30 (q,  $J = 7.2$  Hz, 2H), 2.40 (s, 3H), 2.37 (s, 3H), 1.36 (s, 9H), 1.33 (t,  $J = 7.2$  Hz, 3H);  $^{13}\text{C}$  NMR (100 MHz,  $\text{DMSO-}d_6$ )  $\delta$  162.8, 154.7, 138.9, 138.6, 134.7, 128.9, 127.2, 126.4, 124.0, 119.4, 116.0, 112.1, 110.2, 101.3, 90.5, 81.8, 60.5, 28.2, 21.8, 14.6, 10.9. HRMS (ESI-Orbitrap,  $m/z$ ): Calcd for  $\text{C}_{23}\text{H}_{27}\text{N}_4\text{O}_4$   $[\text{M}+\text{H}]^+$  423.2027; Found 423.2029.

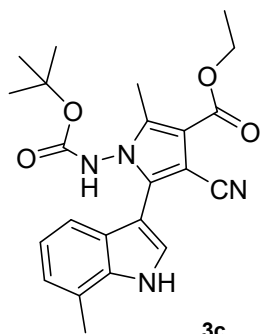

**Ethyl 1-((tert-butoxycarbonyl)amino)-4-cyano-2-methyl-5-(7-methyl-1H-indol-3-yl)-1H-pyrrole-3-carboxylate (3c):** compound **3c** was isolated by column chromatography (ethyl acetate/cyclohexane 30:70) in 60% yield (101.4 mg); white solid; mp: 148–150 °C;  $^1\text{H}$  NMR (400 MHz,  $\text{DMSO-}d_6$ )  $\delta$  11.71 (s, 1H), 10.54 (s, 1H), 7.50 (d,  $J = 2.5$  Hz, 1H), 7.33 (t,  $J = 4.4$  Hz, 1H), 7.00 (d,  $J = 4.6$  Hz, 2H), 4.29 (q,  $J = 7.2$  Hz, 2H), 2.51 (s, 3H), 2.41 (s, 3H), 1.38 (s, 9H), 1.33 (t,  $J = 7.2$  Hz, 3H);  $^{13}\text{C}$  NMR (100 MHz,  $\text{DMSO-}d_6$ )  $\delta$  163.2, 154.9, 139.4, 138.8, 135.7, 126.7, 125.6, 123.1, 121.9, 120.8, 117.3, 116.3, 110.2, 102.1, 90.1, 82.5, 60.9, 28.0, 16.9, 14.4, 10.7. HRMS (ESI-Orbitrap,  $m/z$ ): Calcd for  $\text{C}_{23}\text{H}_{27}\text{N}_4\text{O}_4$   $[\text{M}+\text{H}]^+$  423.2027; Found 423.2008.

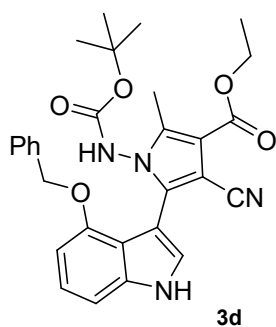

**Ethyl 5-(4-(benzyloxy)-1H-indol-3-yl)-1-((tert-butoxycarbonyl)amino)-4-cyano-2-methyl-1H-pyrrole-3-carboxylate (3d):** compound **3d** was isolated by column chromatography (ethyl acetate/cyclohexane 30:70) in 39% yield (80.3 mg); white solid; mp: 180–182 °C; Notably, compound **3d** at NMR analysis shows two sets of peaks. This fact is probably ascribable to the presence of bulky substituents around C3-C2' bond that determines the existence of rotamers (ca 95:5 ratio). For clarity only the signals of the main rotamer are reported;  $^1\text{H}$  NMR (400 MHz,  $\text{DMSO-}d_6$ )  $\delta$  11.65 (s, 1H), 10.27 (s, 1H), 7.35–7.11 (m, 8H), 6.72 (dd,  $J = 6.3, 2.0$  Hz, 1H), 5.05 (s, 2H), 4.46–3.99 (m, 2H), 2.27 (s, 3H), 1.35 (s, 9H), 1.30 (t,  $J = 7.2$  Hz, 3H);  $^{13}\text{C}$  NMR (100 MHz,  $\text{DMSO-}d_6$ )  $\delta$  162.9, 155.1, 152.8, 139.3, 137.9, 137.6, 128.3, 128.1, 127.7, 127.3, 126.1, 123.4, 117.4, 116.3, 109.7, 105.9, 102.0, 100.5, 92.8, 81.7, 69.5, 60.3, 28.2, 14.6, 10.8. HRMS (ESI-Orbitrap,  $m/z$ ): Calcd for  $\text{C}_{29}\text{H}_{31}\text{N}_4\text{O}_5$   $[\text{M}+\text{H}]^+$  515.2289; Found 515.2301.

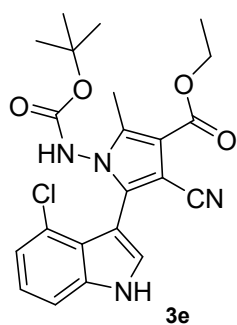

**Ethyl 1-((tert-butoxycarbonyl)amino)-5-(4-chloro-1H-indol-3-yl)-4-cyano-2-methyl-1H-pyrrole-3-carboxylate (3e):** compound **3e** was isolated by column chromatography (ethyl acetate/cyclohexane 35:65) in 63% yield (111.6 mg); white solid; mp: 202–204 °C;  $^1\text{H}$  NMR (400 MHz,  $\text{DMSO-}d_6$ )  $\delta$  8.94 (s, 1H), 7.38 (s, 1H), 7.36 (d,  $J = 3.1$  Hz, 1H), 7.27 (s, 1H), 7.14–7.19 (m, 2H), 4.41 (q,  $J = 7.2$  Hz, 2H), 2.57 (s, 3H), 1.43 (t,  $J = 7.2$  Hz, 3H), 1.18 (s, 9H);  $^{13}\text{C}$  NMR (100 MHz,  $\text{DMSO-}d_6$ )  $\delta$  162.8, 155.1, 138.3, 137.5, 129.3, 124.8, 124.4, 123.2, 120.9, 116.0, 115.9, 111.8,

## ELECTRONIC SUPPORTING INFORMATION

109.9, 100.5, 94.4, 81.8, 60.5, 28.2, 14.5, 11.0. HRMS (ESI-Orbitrap,  $m/z$ ): Calcd for  $C_{22}H_{24}ClN_4O_4$   $[M+H]^+$  443.1481; Found 443.1495.

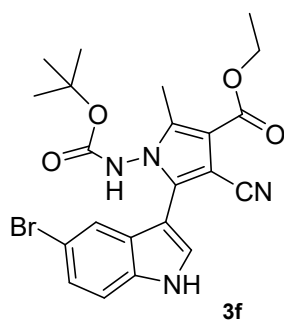

**Ethyl 5-(5-bromo-1H-indol-3-yl)-1-((tert-butoxycarbonyl)amino)-4-cyano-2-methyl-1H-pyrrole-3-carboxylate (3f):** compound **3f** was isolated by column chromatography (ethyl acetate/cyclohexane 30:70) in 38% yield (74.1 mg); white solid; mp: 188–190 °C;  $^1H$  NMR (400 MHz,  $DMSO-d_6$ )  $\delta$  11.92 (s, 1H), 10.57 (s, 1H), 7.62 (m, 2H), 7.48 (d,  $J$  = 8.8 Hz, 1H), 7.32 (dd,  $J$  = 8.8 Hz, 2.0 Hz, 1H), 4.30 (q,  $J$  = 7.2 Hz, 2H), 2.41 (s, 3H), 1.34 (s, 9H), 1.32 (t,  $J$  = 7.2 Hz, 3H);  $^{13}C$  NMR (100 MHz,  $DMSO-d_6$ )  $\delta$  162.7, 154.7, 139.1, 137.6, 135.1, 129.0, 127.8, 125.1, 121.9, 115.9, 114.6, 113.1, 110.3, 101.5, 90.9, 82.0, 60.6, 28.2, 14.5, 10.9. HRMS (ESI-Orbitrap,  $m/z$ ): Calcd for  $C_{22}H_{24}BrN_4O_4$   $[M+H]^+$  487.0975; Found 487.0969.

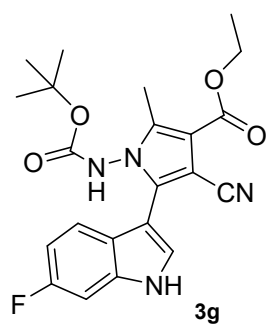

**Ethyl 1-((tert-butoxycarbonyl)amino)-4-cyano-5-(6-fluoro-1H-indol-3-yl)-2-methyl-1H-pyrrole-3-carboxylate (3g):** compound **3g** was isolated by column chromatography (ethyl acetate/cyclohexane 25:75) in 65% yield (110.9 mg); pale yellow solid; mp: 182–184 °C;  $^1H$  NMR (400 MHz,  $DMSO-d_6$ )  $\delta$  11.79 (s, 1H), 10.57 (s, 1H), 7.54 (d,  $J$  = 2.6 Hz, 1H), 7.48 (dd,  $J$  = 8.8, 5.3 Hz, 1H), 7.30 (dd,  $J$  = 9.8, 2.4 Hz, 1H), 6.98 (dt,  $J$  = 9.2, 2.4 Hz, 1H), 4.30 (q,  $J$  = 7.2 Hz, 2H), 2.41 (s, 3H), 1.36 (m, 12H);  $^{13}C$  NMR (100 MHz,  $DMSO-d_6$ )  $\delta$  162.7, 159.5 ( $J$  = 234.3 Hz), 154.7, 139.1, 137.9, 136.2 ( $J$  = 12.7), 127.9, 122.8, 121.0 ( $J$  = 10.3 Hz), 115.9, 110.3, 108.8 ( $J$  = 24.5 Hz), 102.0, 98.5 ( $J$  = 25.5), 90.7, 81.9, 60.5, 28.2, 14.5, 10.9. HRMS (ESI-Orbitrap,  $m/z$ ): Calcd for  $C_{22}H_{24}FN_4O_4$   $[M+H]^+$  427.1776; Found 427.1759.

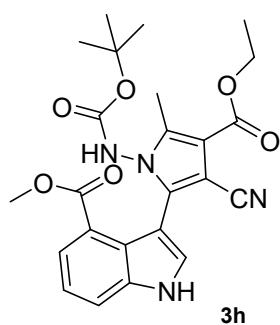

**Methyl 3-(1-((tert-butoxycarbonyl)amino)-3-cyano-4-(ethoxycarbonyl)-5-methyl-1H-pyrrol-2-yl)-1H-indole-4-carboxylate (3h):** compound **3h** was isolated by column chromatography (ethyl acetate/cyclohexane 35:65) in 90% yield (167.9 mg); white solid; mp: 142–144 °C;  $^1H$  NMR (400 MHz,  $CDCl_3$ )  $\delta$  9.69 (s, 1H), 7.78 (brs, 1H), 7.75 (d,  $J$  = 7.5 Hz, 1H), 7.51 (d,  $J$  = 7.8 Hz, 1H), 7.22–7.11 (m, 2H), 4.39 (m, 2H), 3.72 (s, 3H), 2.59 (s, 3H), 1.43 (s, 9H), 1.26 (t,  $J$  = 7.2, 3H);  $^{13}C$  NMR (100 MHz,  $CDCl_3$ )  $\delta$  168.8, 163.4, 154.1, 139.2, 139.0, 137.2, 130.9, 124.7, 124.3, 122.0, 121.7, 116.9, 116.5, 109.8, 101.6, 93.2, 82.5, 60.4, 52.3, 26.9, 14.3, 10.8. HRMS (ESI-Orbitrap,  $m/z$ ): Calcd for  $C_{24}H_{27}N_4O_6$   $[M+H]^+$  467.1925; Found 467.1911.

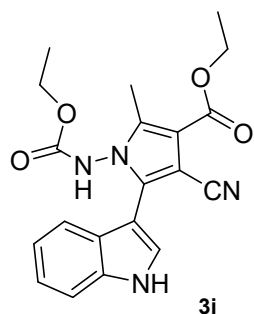

**Ethyl 4-cyano-1-((ethoxycarbonyl)amino)-5-(1H-indol-3-yl)-2-methyl-1H-pyrrole-3-carboxylate (3i):** compound **3i** was isolated by column chromatography (ethyl acetate/cyclohexane 30:70) in 67% yield (101.9 mg); white solid; mp: 206–

## ELECTRONIC SUPPORTING INFORMATION

208 °C;  $^1\text{H}$  NMR (400 MHz,  $\text{DMSO-}d_6$ )  $\delta$  11.71 (s, 1H), 10.87 (s, 1H), 7.55 (d,  $J = 2.4$  Hz, 1H), 7.50 (d,  $J = 8.6$  Hz, 2H), 7.20 (t,  $J = 8.0$  Hz, 1H), 7.11 (t,  $J = 7.6$  Hz, 1H), 4.30 (q,  $J = 7.2$  Hz, 2H), 4.08 (q,  $J = 6.8$  Hz, 2H), 2.41 (s, 3H), 1.33 (t,  $J = 7.2$  Hz, 3H), 1.12 (t,  $J = 6.8$  Hz, 3H);  $^{13}\text{C}$  NMR (100 MHz,  $\text{DMSO-}d_6$ )  $\delta$  162.8, 155.7, 139.0, 138.3, 136.3, 127.2, 125.9, 122.5, 120.3, 119.8, 115.9, 112.5, 110.3, 101.9, 90.5, 62.4, 60.6, 14.7, 14.5, 10.9. HRMS (ESI-Orbitrap,  $m/z$ ): Calcd for  $\text{C}_{20}\text{H}_{21}\text{N}_4\text{O}_4$   $[\text{M}+\text{H}]^+$  381.1557; Found 381.1535.

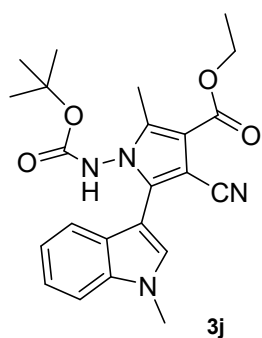

3j

**Ethyl 1-((tert-butoxycarbonyl)amino)-4-cyano-2-methyl-5-(1-methyl-1H-indol-3-yl)-1H-pyrrole-3-carboxylate (3j):** compound **3j** was isolated by column chromatography (ethyl acetate/cyclohexane 30:70) in 80% yield (135.2 mg); white solid; mp: 182–184 °C;  $^1\text{H}$  NMR (400 MHz,  $\text{DMSO-}d_6$ )  $\delta$  10.54 (s, 1H), 7.56 (d,  $J = 8.3$  Hz, 1H), 7.51 (s, 1H), 7.50 (d,  $J = 8.3$  Hz, 1H), 7.27 (t,  $J = 7.6$  Hz, 1H), 7.14 (t,  $J = 7.6$  Hz, 1H), 4.30 (q,  $J = 7.2$  Hz, 2H), 3.88 (s, 3H), 2.41 (s, 3H), 1.37 (s, 9H), 1.32 (t,  $J = 7.2$  Hz, 3H);  $^{13}\text{C}$  NMR (100 MHz,  $\text{DMSO-}d_6$ )  $\delta$  162.7, 154.8, 139.0,

137.9, 136.9, 131.0, 126.4, 122.5, 120.5, 120.0, 115.9, 110.9, 110.3, 101.0, 90.6, 81.9, 60.5, 33.3, 28.2, 14.6, 10.9. HRMS (ESI-Orbitrap,  $m/z$ ): Calcd for  $\text{C}_{23}\text{H}_{27}\text{N}_4\text{O}_4$   $[\text{M}+\text{H}]^+$  423.2027; Found 423.2033.

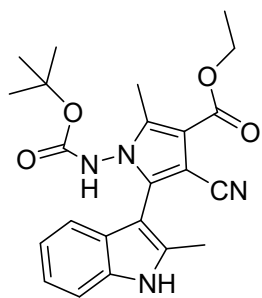

3k

**Ethyl 1-((tert-butoxycarbonyl)amino)-4-cyano-2-methyl-5-(2-methyl-1H-indol-3-yl)-1H-pyrrole-3-carboxylate (3k):** compound **3k** was isolated by column chromatography (ethyl acetate/cyclohexane 30:70) in 77% yield (130.1 mg); white solid; mp: 146–148 °C; Notably, compound **3k** at NMR analysis shows two sets of peaks. This fact is probably ascribable to the presence of bulky substituents around C3-C2' bond that determines the existence of rotamers (ca 60:40 ratio).

For clarity only the signals of the main rotamer are reported;  $^1\text{H}$  NMR (400 MHz,

$\text{DMSO-}d_6$ )  $\delta$  11.54 (s, 1H), 10.47 (s, 1H), 7.37–6.91 (m, 4H), 4.29 (q,  $J = 7.2$  Hz, 2H), 2.40 (s, 3H), 2.32 (s, 3H), 1.40 (s, 9H), 1.32 (t,  $J = 7.2$  Hz, 3H);  $^{13}\text{C}$  NMR (100 MHz,  $\text{DMSO-}d_6$ )  $\delta$  162.8, 154.5, 139.3, 138.7, 138.1, 135.5, 127.9, 121.5, 120.0, 118.8, 118.6, 115.9, 111.4, 110.1, 99.1, 92.1, 81.7, 60.5, 28.2, 26.8, 14.5. HRMS (ESI-Orbitrap,  $m/z$ ): Calcd for  $\text{C}_{23}\text{H}_{27}\text{N}_4\text{O}_4$   $[\text{M}+\text{H}]^+$  423.2027; Found 423.2041.

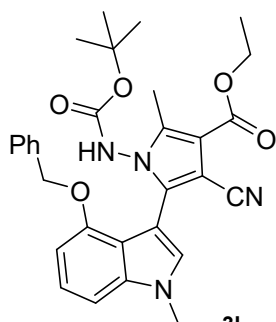

3l

**Ethyl 5-(4-(benzyloxy)-1-methyl-1H-indol-3-yl)-1-((tert-butoxycarbonyl)amino)-4-cyano-2-methyl-1H-pyrrole-3-carboxylate (3l):**

compound **3l** was isolated by column chromatography (ethyl acetate/cyclohexane 30:70) in 45% yield (95.1 mg); white solid; mp: 163–165 °C; Notably, compound **3l** at NMR analysis shows two sets of peaks. This fact is probably ascribable to the presence of bulky substituents around C3-C2' bond that determines the existence of rotamers (ca 95:5 ratio). For clarity only the

signals of the main rotamer are reported;  $^1\text{H}$  NMR (400 MHz,  $\text{DMSO-}d_6$ )  $\delta$  10.29 (br, 1H), 7.30–7.10 (m,



## ELECTRONIC SUPPORTING INFORMATION

8H), 6.77 (d,  $J = 7.2$  Hz, 1H), 5.06 (s, 2H), 4.27 ( $J = 7.2$  Hz, 2H), 3.82 (s, 3H), 2.28 (s, 3H), 1.36 (s, 9H), 1.30 (t,  $J = 7.2$  Hz, 3H).  $^{13}\text{C}$  NMR (100 MHz, DMSO- $d_6$ )  $\delta$  162.9, 155.1, 152.8, 138.4, 137.5, 130.0, 128.3, 128.1, 127.7, 127.3, 127.2, 123.5, 117.6, 116.2, 109.7, 104.2, 102.3, 99.6, 92.9, 81.7, 69.6, 60.3, 33.4, 28.1, 14.5, 10.8. HRMS (ESI-Orbitrap,  $m/z$ ): Calcd for  $\text{C}_{30}\text{H}_{33}\text{N}_4\text{O}_5$   $[\text{M}+\text{H}]^+$  529.2445; Found 529.2432.

### 4. Synthetic transformations

#### 4.1 Access to compound **4a**

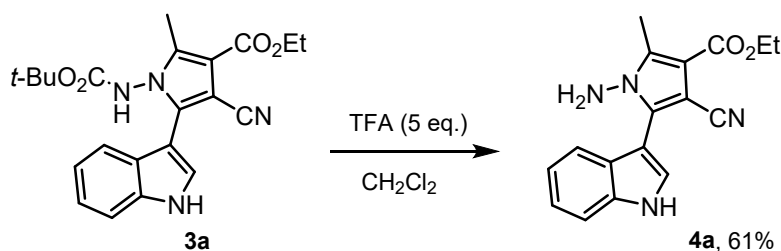

Compound **4a** was prepared according to the literature procedure<sup>5</sup>. To a solution of **3a** (81.7 mg, 0.2 mmol) in dichloromethane (2 mL) was added TFA (96.0 mg, 1.0 mmol) dropwise at 0 °C. The mixture was stirred at rt until TLC showed complete consumption of starting material. Water was added and the mixture was extracted with AcOEt (2 × 10 mL). The combined organic layer was washed with brine, separated, dried over  $\text{Na}_2\text{SO}_4$  and filtered. After the solvent was removed under reduced pressure, the residue was purified by silica gel column chromatography (ethyl acetate/cyclohexane 40:60) to afford **4a** as white solid (37.6 mg, 61%).

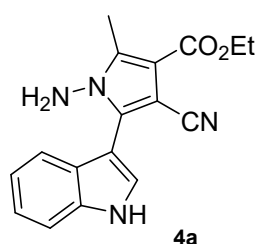

#### **Ethyl 1-amino-4-cyano-5-(1H-indol-3-yl)-2-methyl-1H-pyrrole-3-carboxylate**

**(4a)**: compound **4a** was isolated by column chromatography (ethyl acetate/cyclohexane 40:60) in 61% yield (37.6 mg); white solid; mp: 209–211 °C;  $^1\text{H}$  NMR (400 MHz, DMSO- $d_6$ )  $\delta$  11.65 (s, 1H), 7.75 (d,  $J = 2.3$  Hz, 1H), 7.57 (d,  $J = 8.0$  Hz, 1H), 7.49 (d,  $J = 8.0$  Hz, 2H), 7.19 (t,  $J = 7.5$  Hz, 1H), 7.11 (d,  $J = 7.5$  Hz, 2H), 4.26 (q,  $J = 7.2$  Hz, 2H), 1.31 (t,  $J = 7.2$  Hz, 3H);  $^{13}\text{C}$  NMR (100 MHz, DMSO-

$d_6$ )  $\delta$  163.2, 139.1, 138.0, 136.3, 127.7, 126.2, 122.1, 120.5, 120.0, 116.9, 112.3, 109.9, 102.9, 88.9, 60.1, 14.6, 11.6. HRMS (ESI-Orbitrap,  $m/z$ ): Calcd for  $\text{C}_{17}\text{H}_{17}\text{N}_4\text{O}_2$   $[\text{M}+\text{H}]^+$  309.1346; Found 309.1341.

4.2 Access to compound **5a**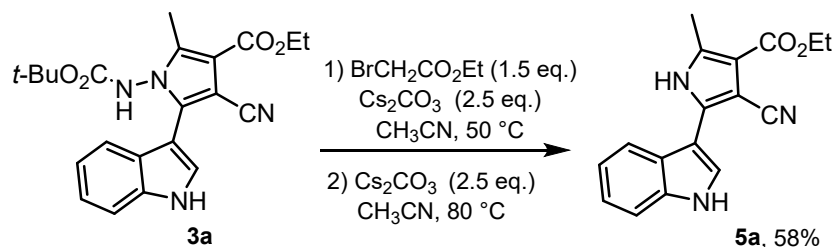

Compound **5a** was prepared according to a modified version of the Magnus method.<sup>6</sup> To a solution of **3a** (81.7 mg, 0.2 mmol) in acetonitrile (5 mL), ethyl bromoacetate (0.033 mL, 0.3 mmol) and Cs<sub>2</sub>CO<sub>3</sub> (162.9 mg, 0.5 mmol) were added. The mixture was stirred at 50 °C (oil bath) until the disappearance of the starting material (0.5 h, TLC check). The solvent was removed under vacuum, water (5 mL) was added, and the mixture was extracted with ethyl acetate (3 x 10 mL). The combined organic layer was dried over Na<sub>2</sub>SO<sub>4</sub> and filtered. After the solvent was removed under reduced pressure, the residue was dissolved in acetonitrile (5 mL) and Cs<sub>2</sub>CO<sub>3</sub> (162.9 mg, 0.5 mmol) was added. The mixture was stirred at 80 °C until TLC showed complete consumption of intermediate. The solvent was removed under vacuum, water (5 mL) was added and the mixture was extracted with ethyl acetate (3 x 10 mL). The collected organic phase was washed with brine, dried over Na<sub>2</sub>SO<sub>4</sub> and filtered. After the solvent was removed under vacuum, the residue was purified by column chromatography (ethyl acetate/cyclohexane 30:70) to afford compound **5a** as a white solid (34.1 mg, 58% yield).

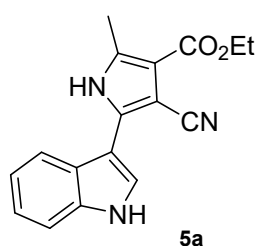

**Ethyl 4-cyano-5-(1H-indol-3-yl)-2-methyl-1H-pyrrole-3-carboxylate (5a):** was isolated by column chromatography (ethyl acetate/cyclohexane 30:70) in 58% yield (34.1 mg); orange solid; mp: 231–233 °C; <sup>1</sup>H NMR (400 MHz, DMSO-*d*<sub>6</sub>) δ 12.11 (s, 1H), 11.65 (s, 1H), 7.75–7.71 (m, 2H), 7.50 (d, *J* = 8.0 Hz, 1H), 7.21 (t, *J* = 8.0 Hz, 1H), 7.14 (t, *J* = 8.0 Hz, 1H), 4.25 (q, *J* = 7.2 Hz, 2H), 2.51 (s, 3H), 1.31 (t, *J* = 7.2 Hz, 3H); <sup>13</sup>C NMR (100 MHz, DMSO-*d*<sub>6</sub>) δ 163.3, 137.9, 136.5, 136.0, 125.9, 125.0, 122.5, 120.2, 120.1, 117.4, 112.5, 112.0, 105.0, 89.1, 60.0, 14.7, 13.1. HRMS (ESI-Orbitrap, *m/z*): Calcd for C<sub>17</sub>H<sub>16</sub>N<sub>3</sub>O<sub>2</sub> [M+H]<sup>+</sup> 294.1237; Found 294.1252.

5.  $^1\text{H}$  and  $^{13}\text{C}$  NMR spectra

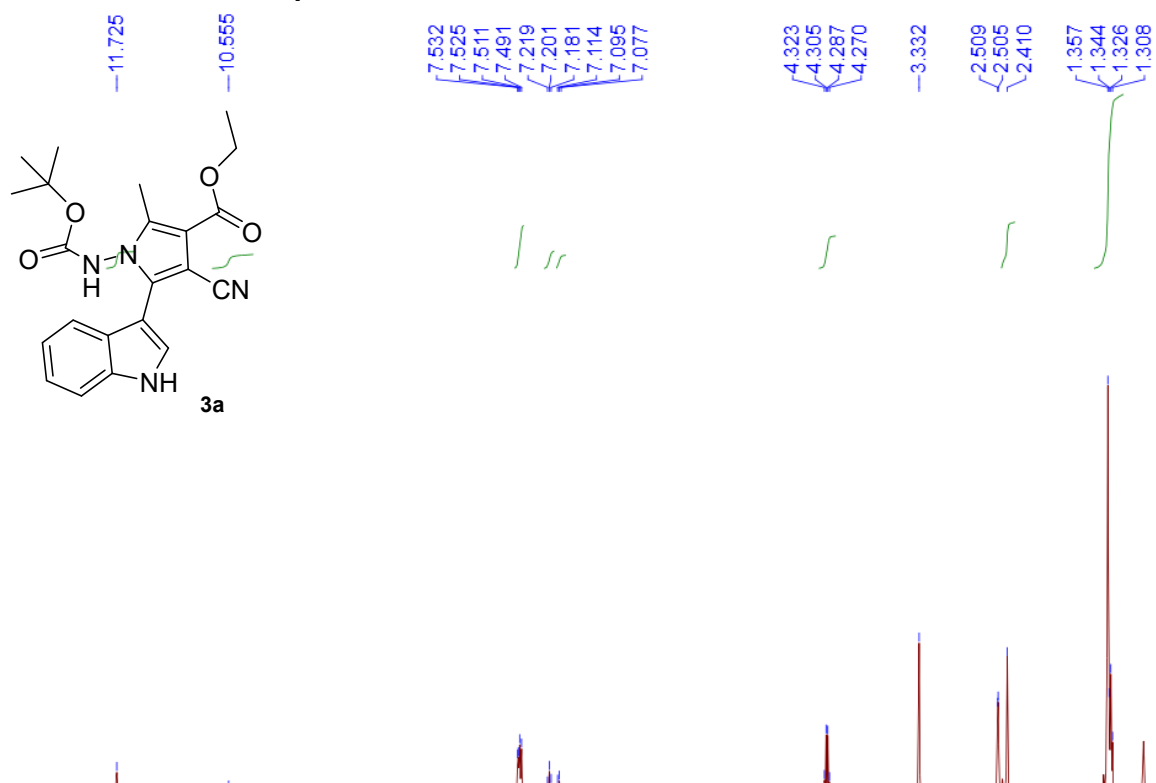

# ELECTRONIC SUPPORTING INFORMATION

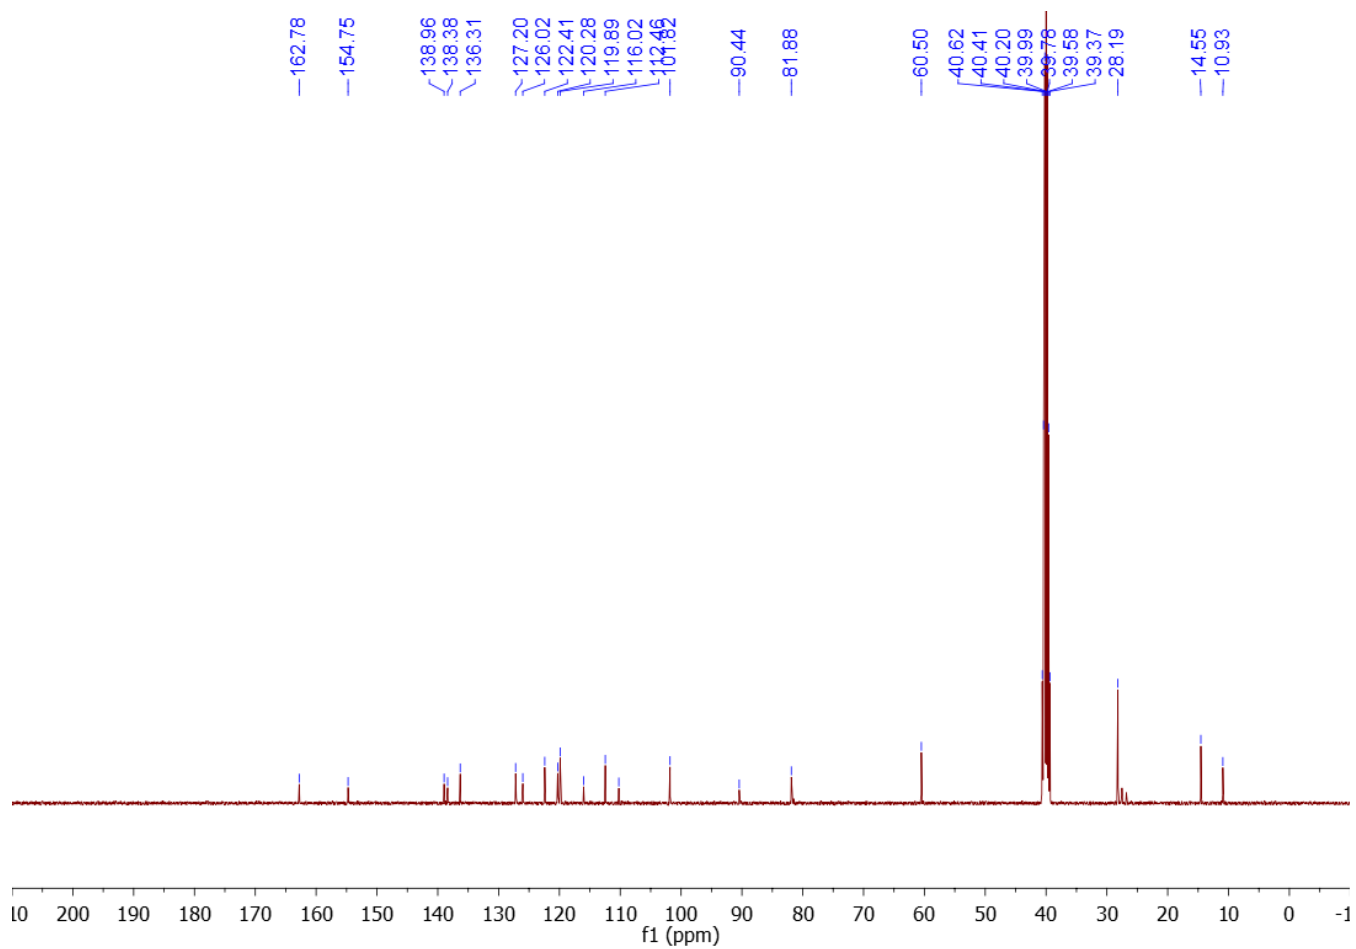

# ELECTRONIC SUPPORTING INFORMATION

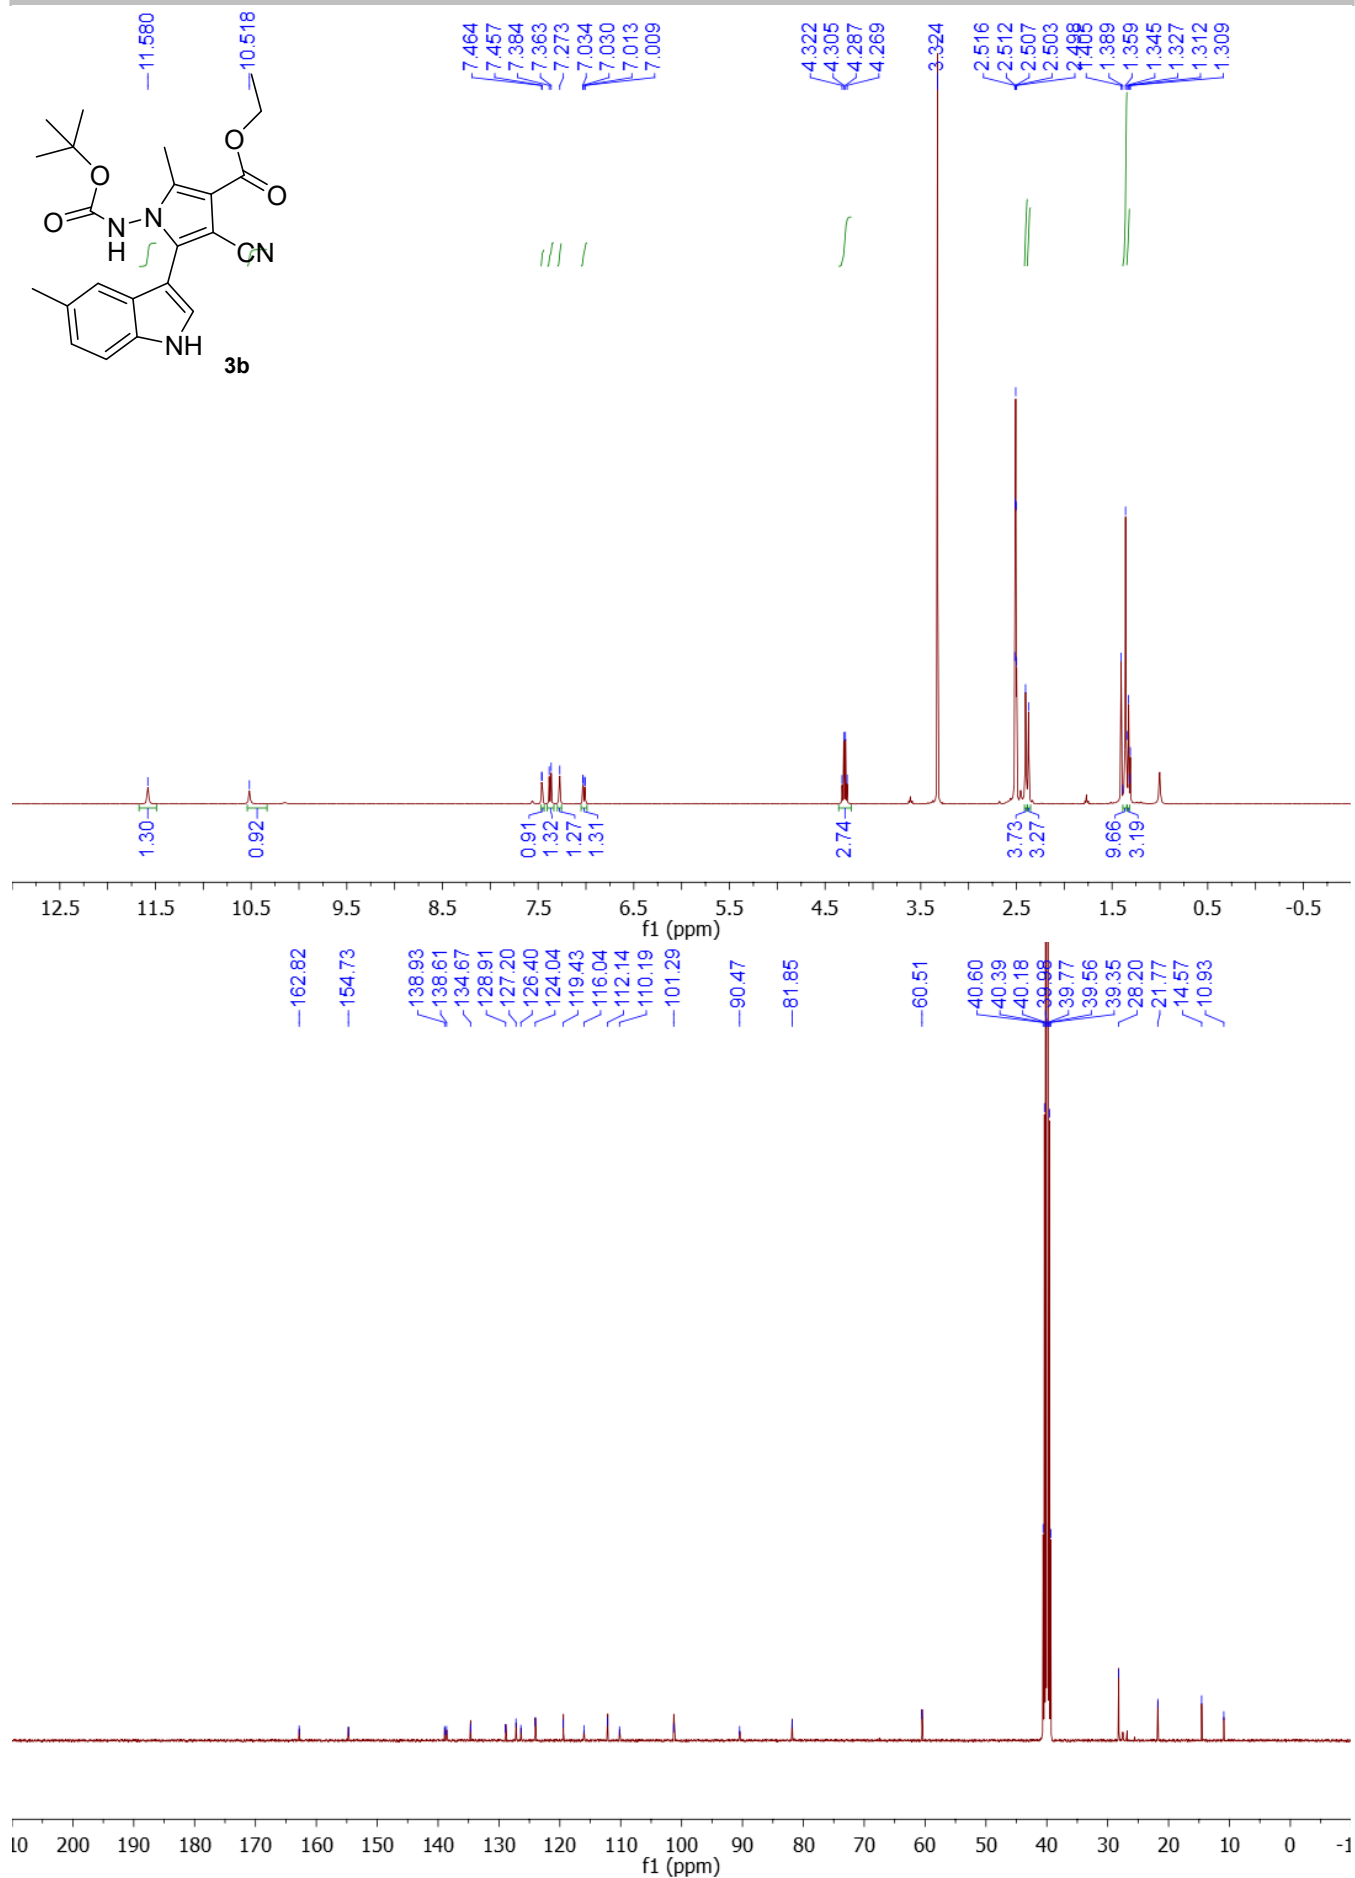

# ELECTRONIC SUPPORTING INFORMATION

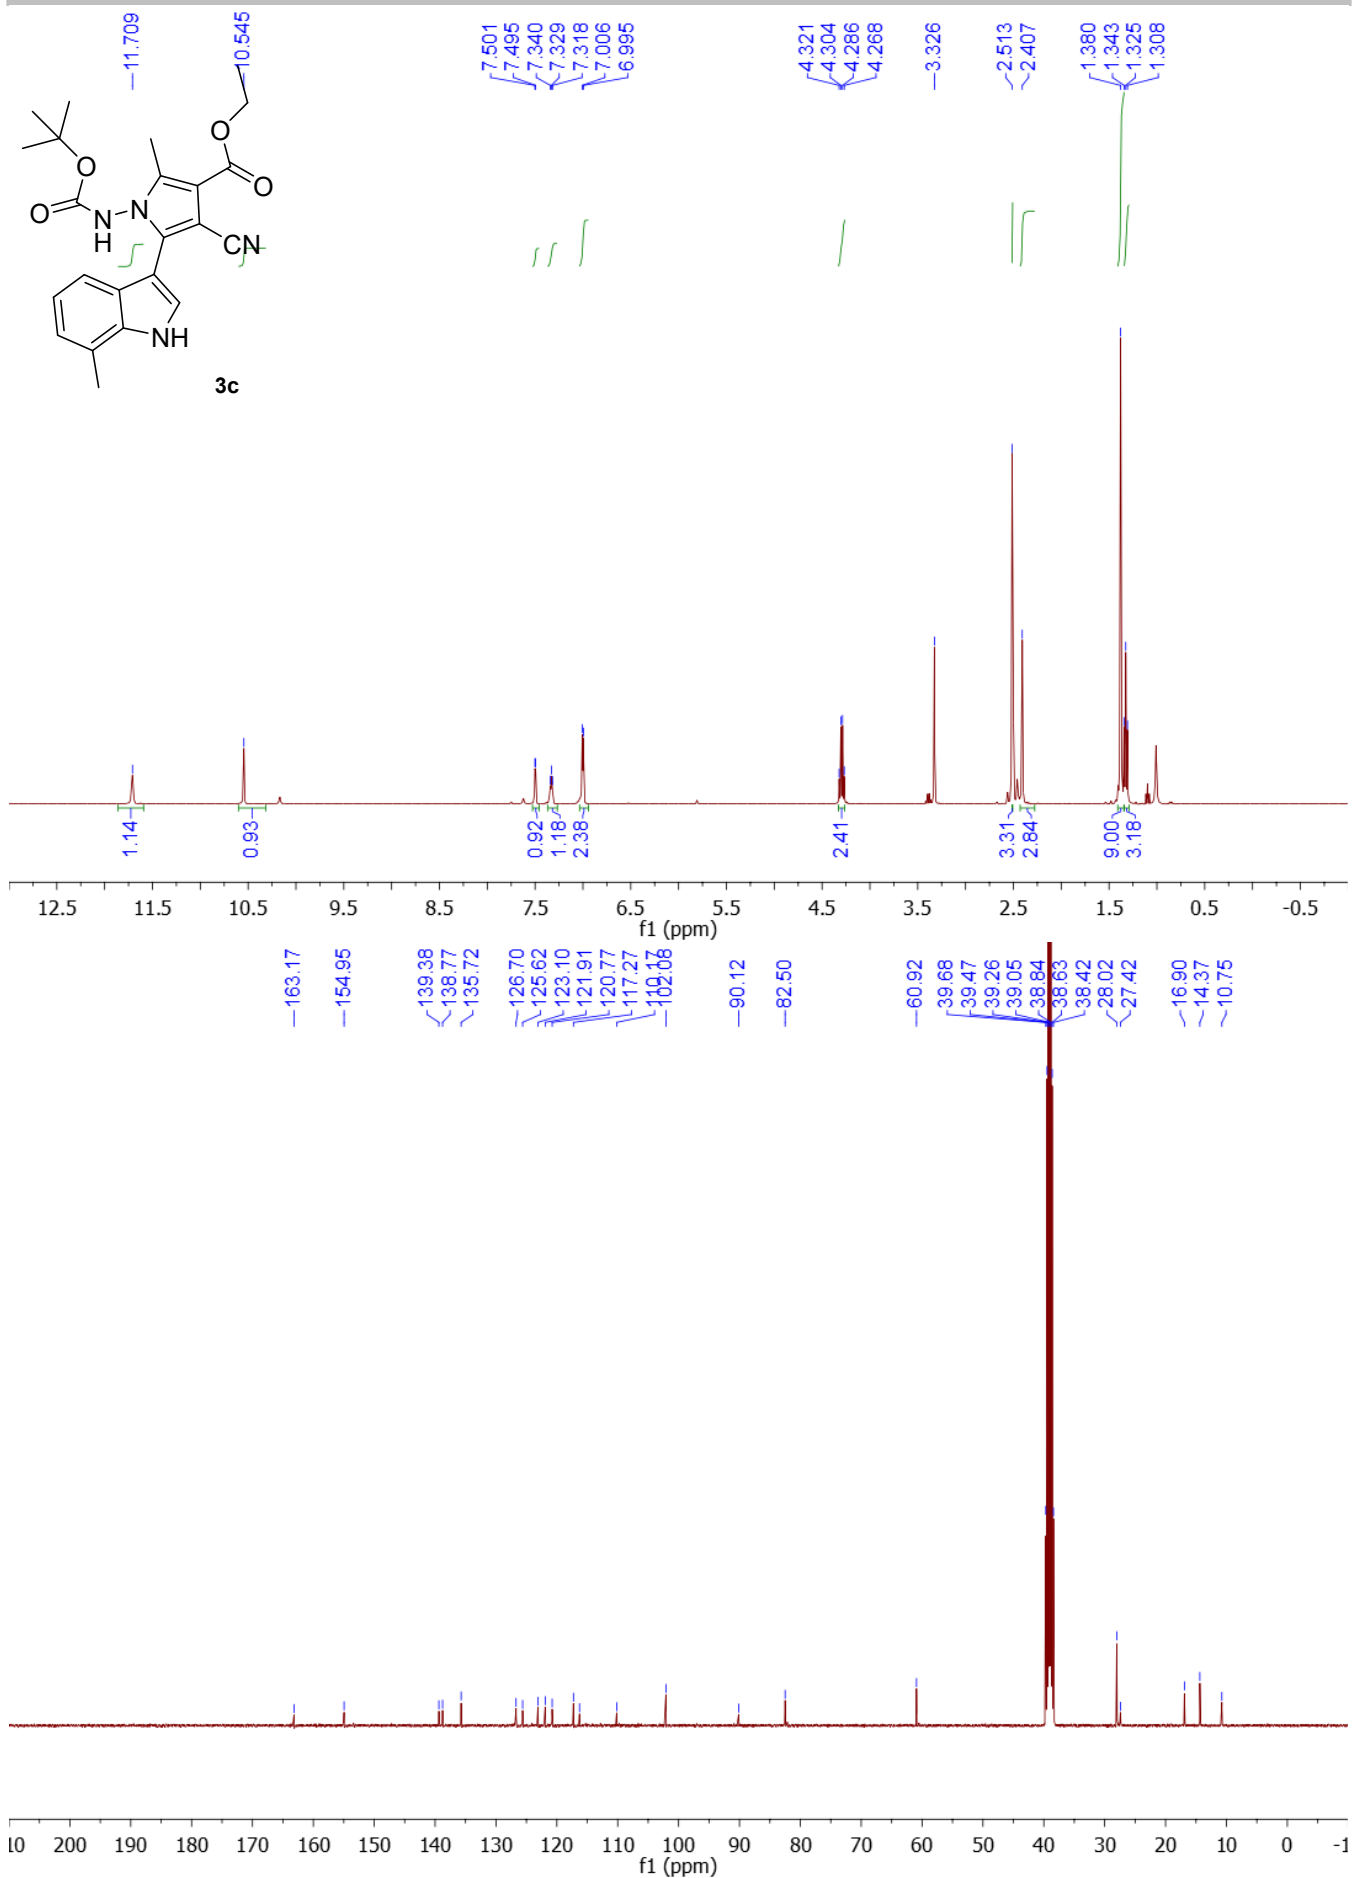

# ELECTRONIC SUPPORTING INFORMATION

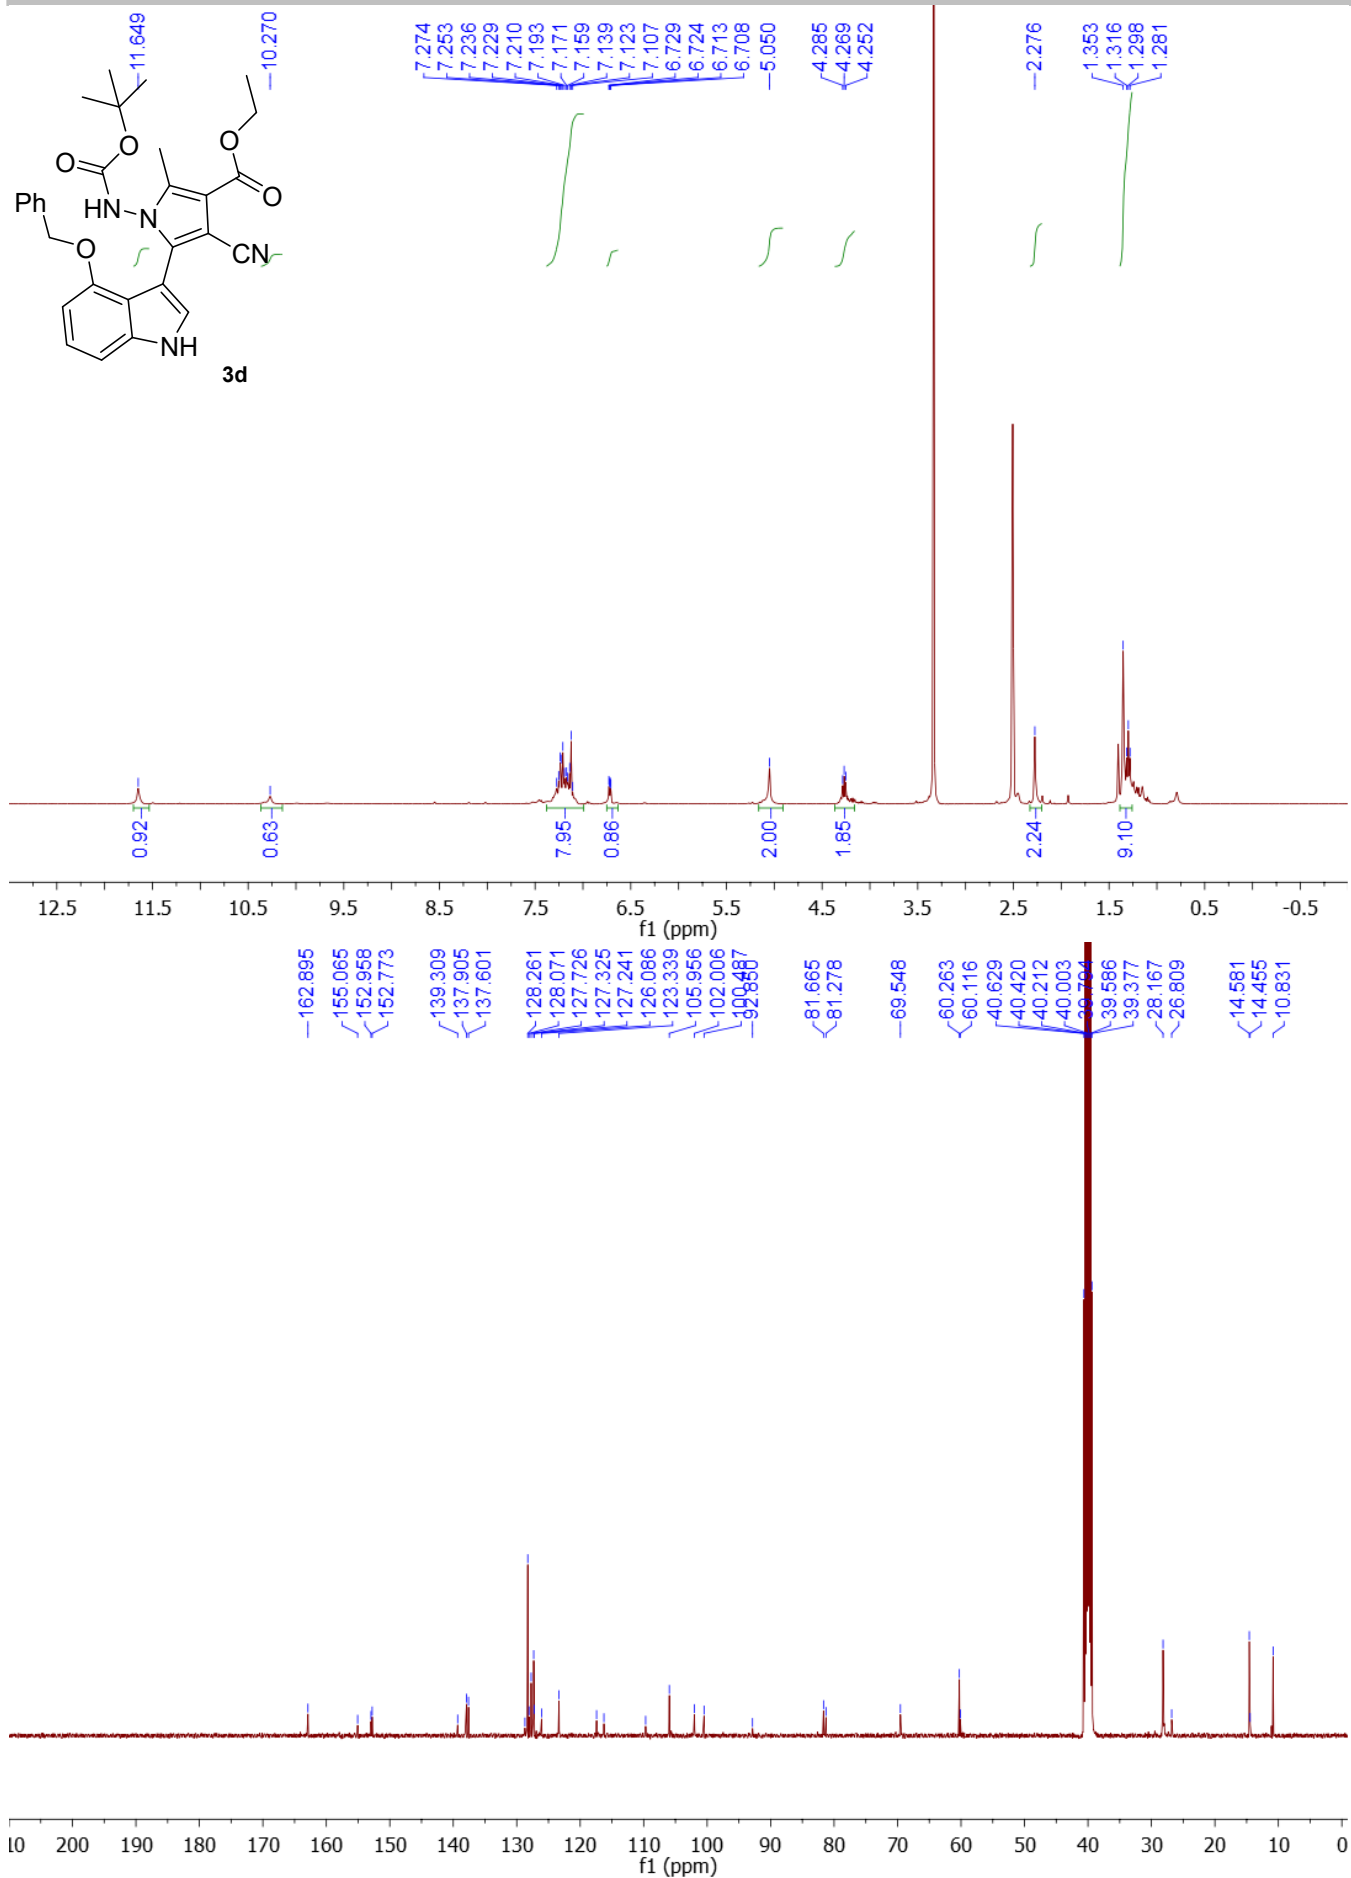

# ELECTRONIC SUPPORTING INFORMATION

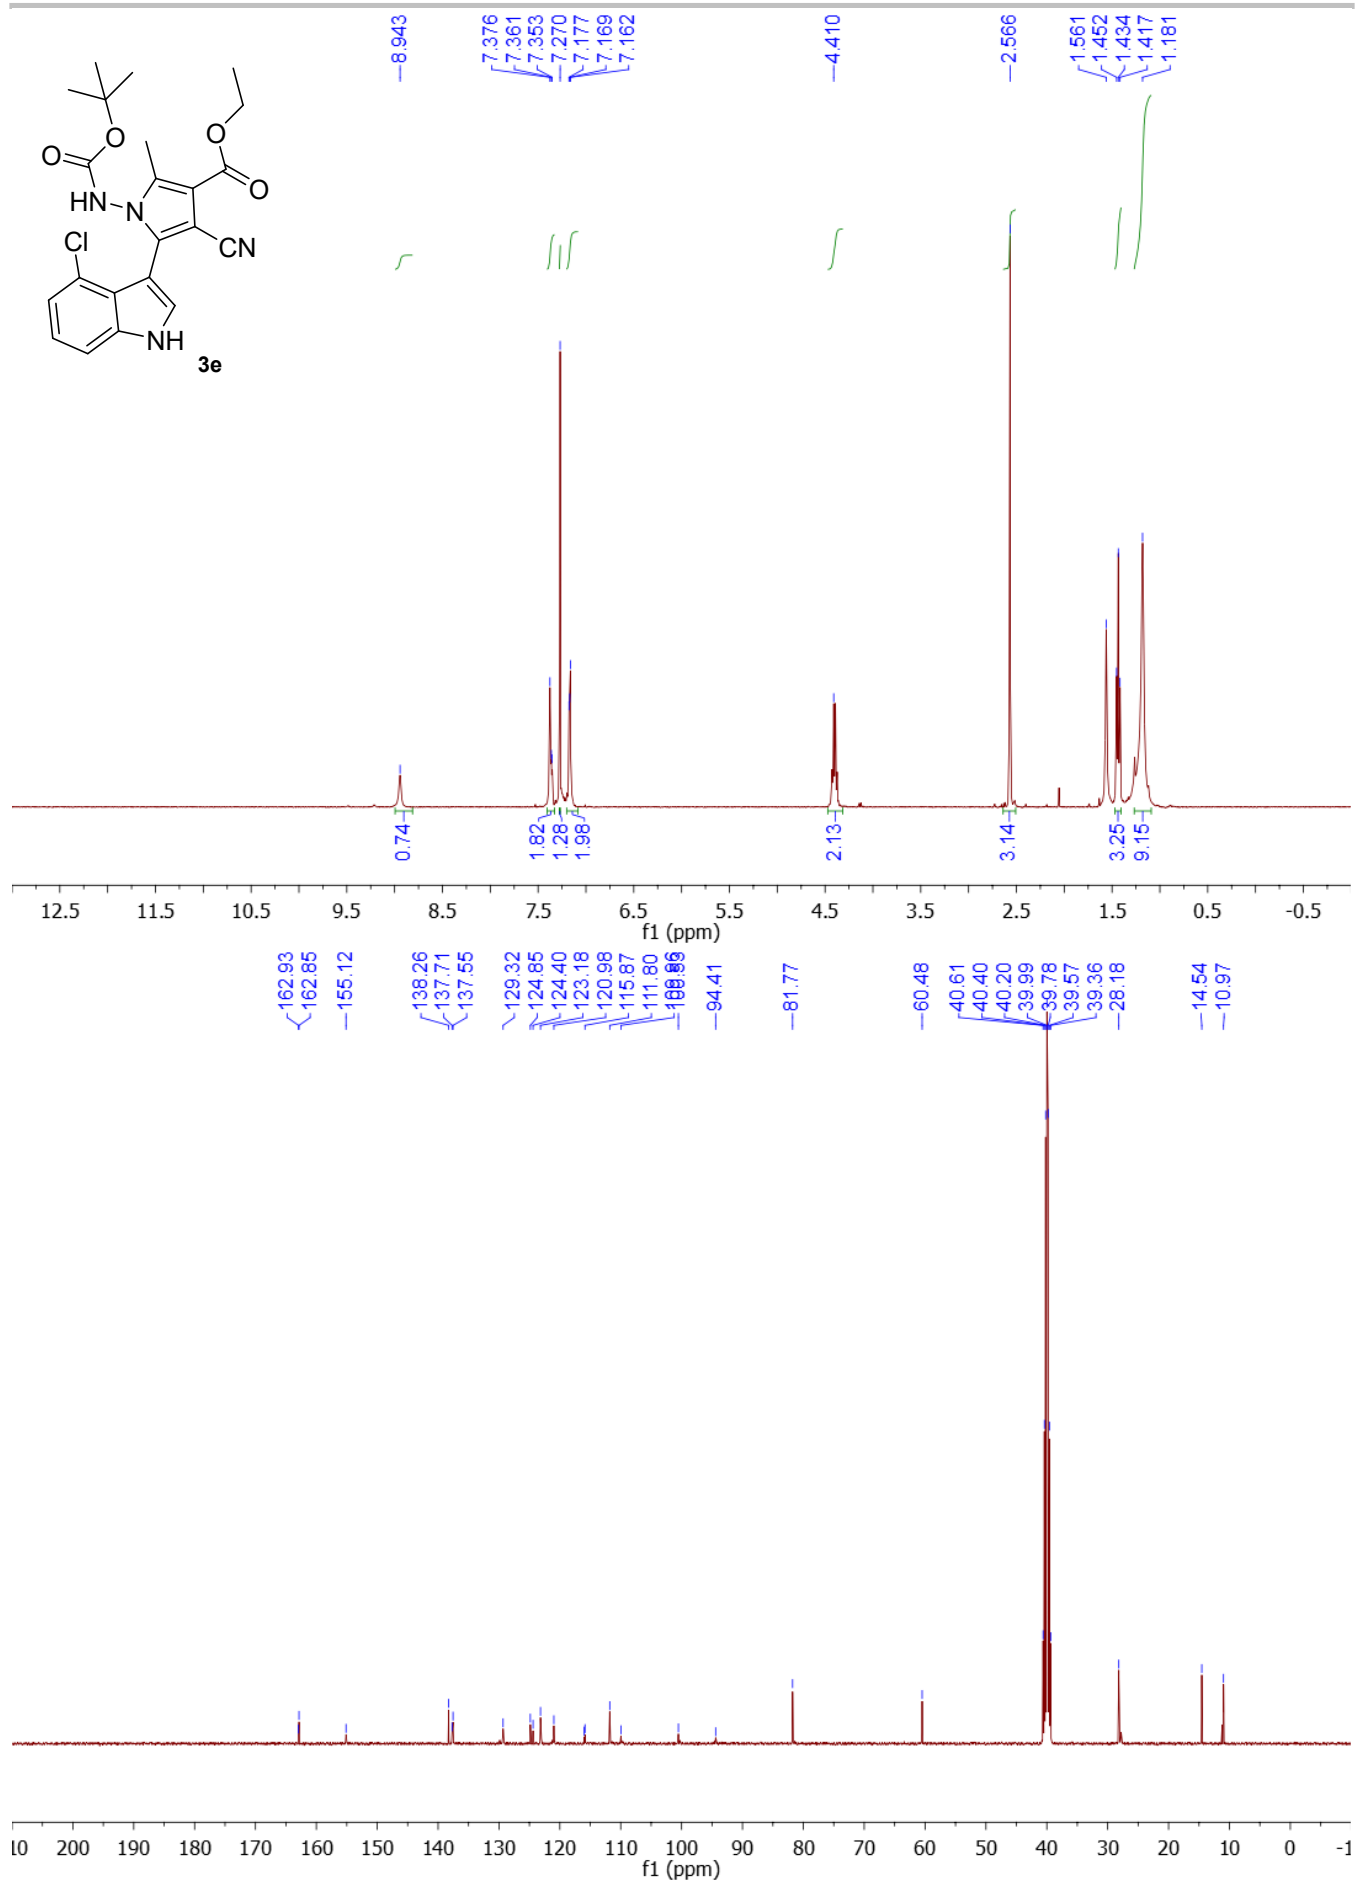



# ELECTRONIC SUPPORTING INFORMATION

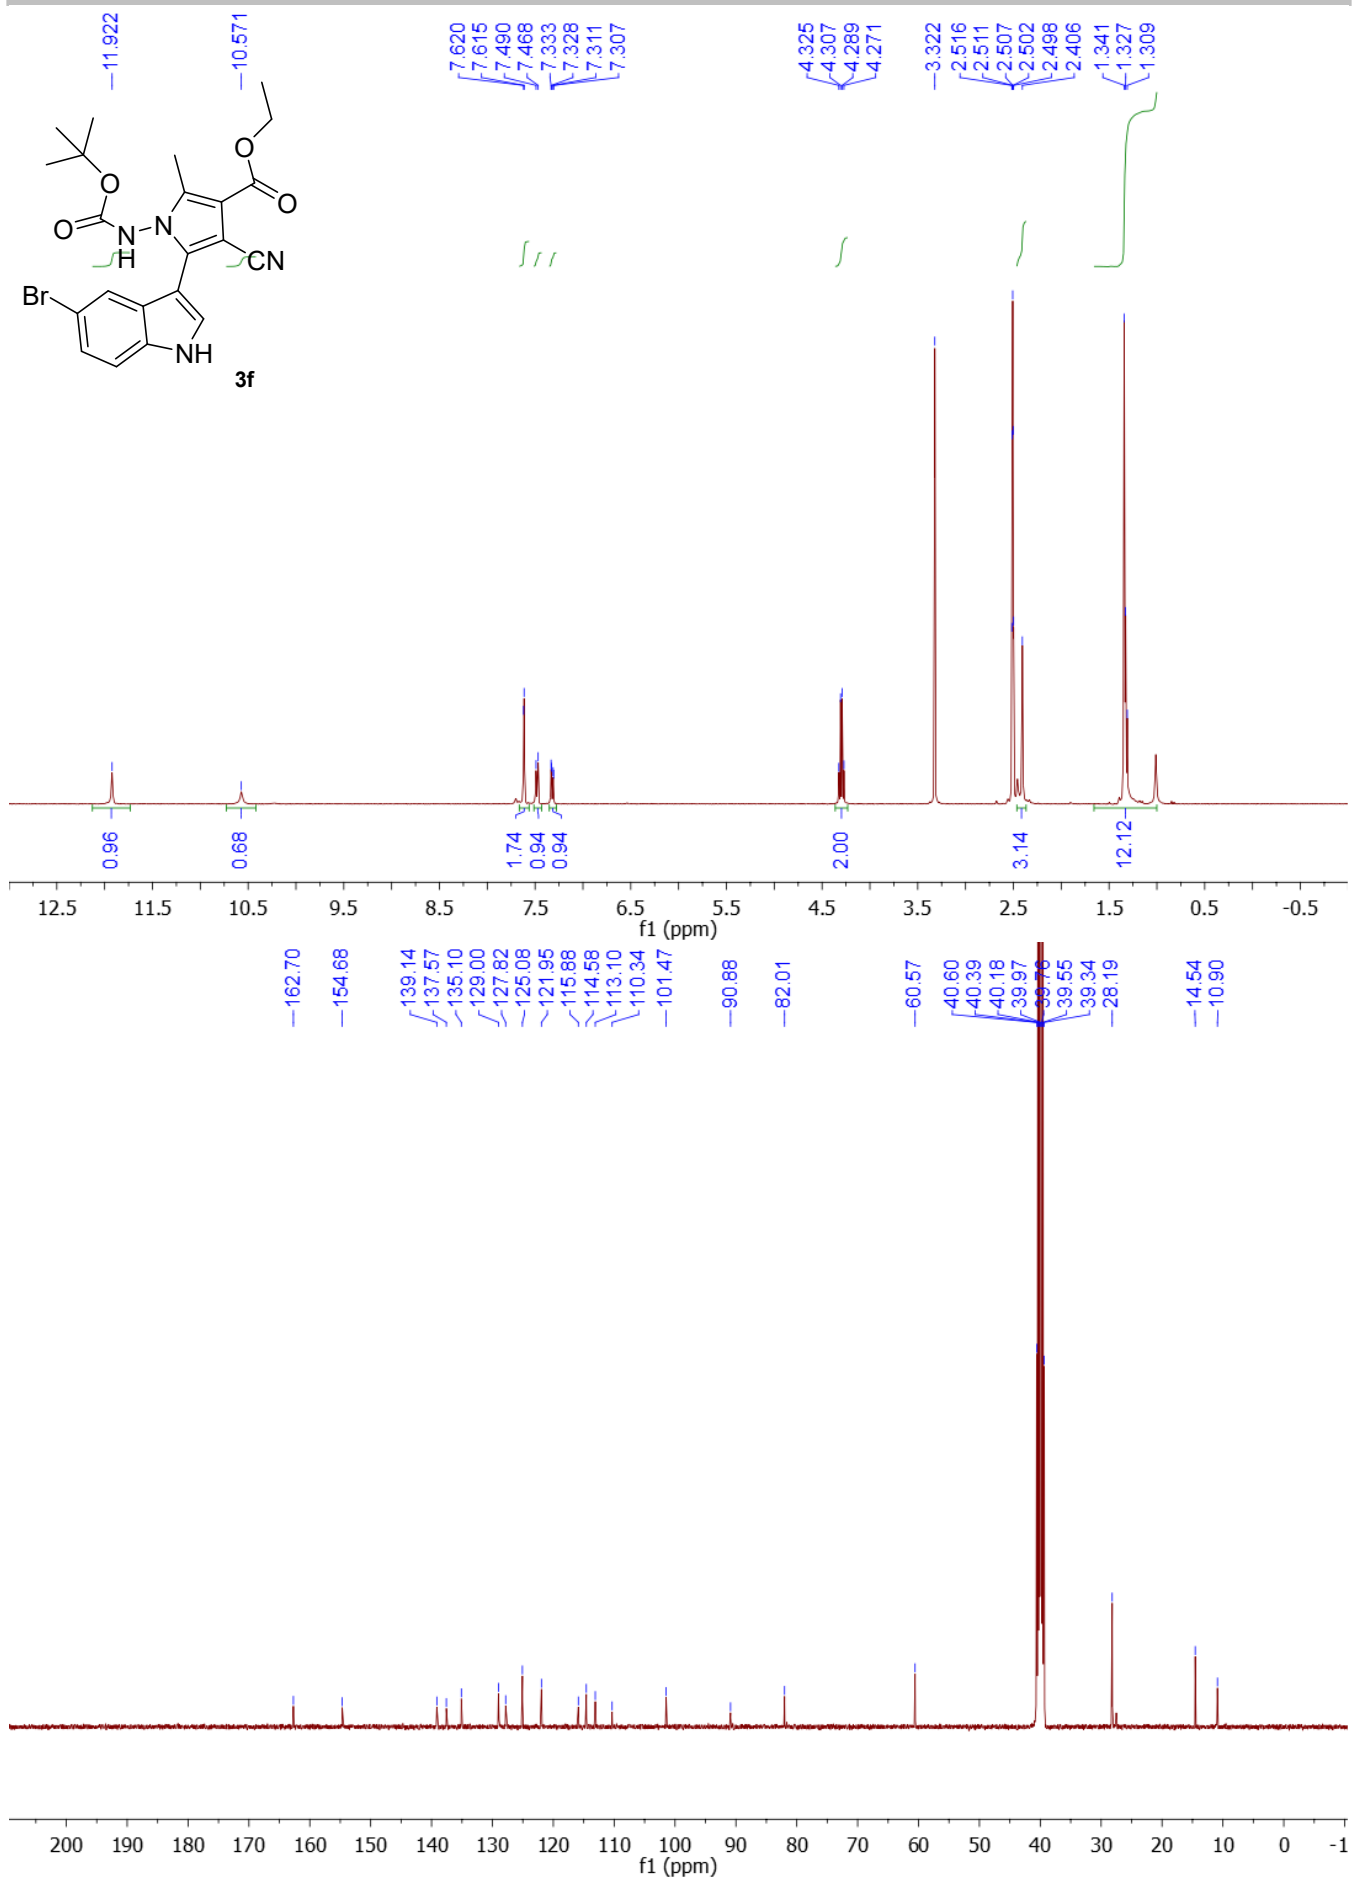

# ELECTRONIC SUPPORTING INFORMATION

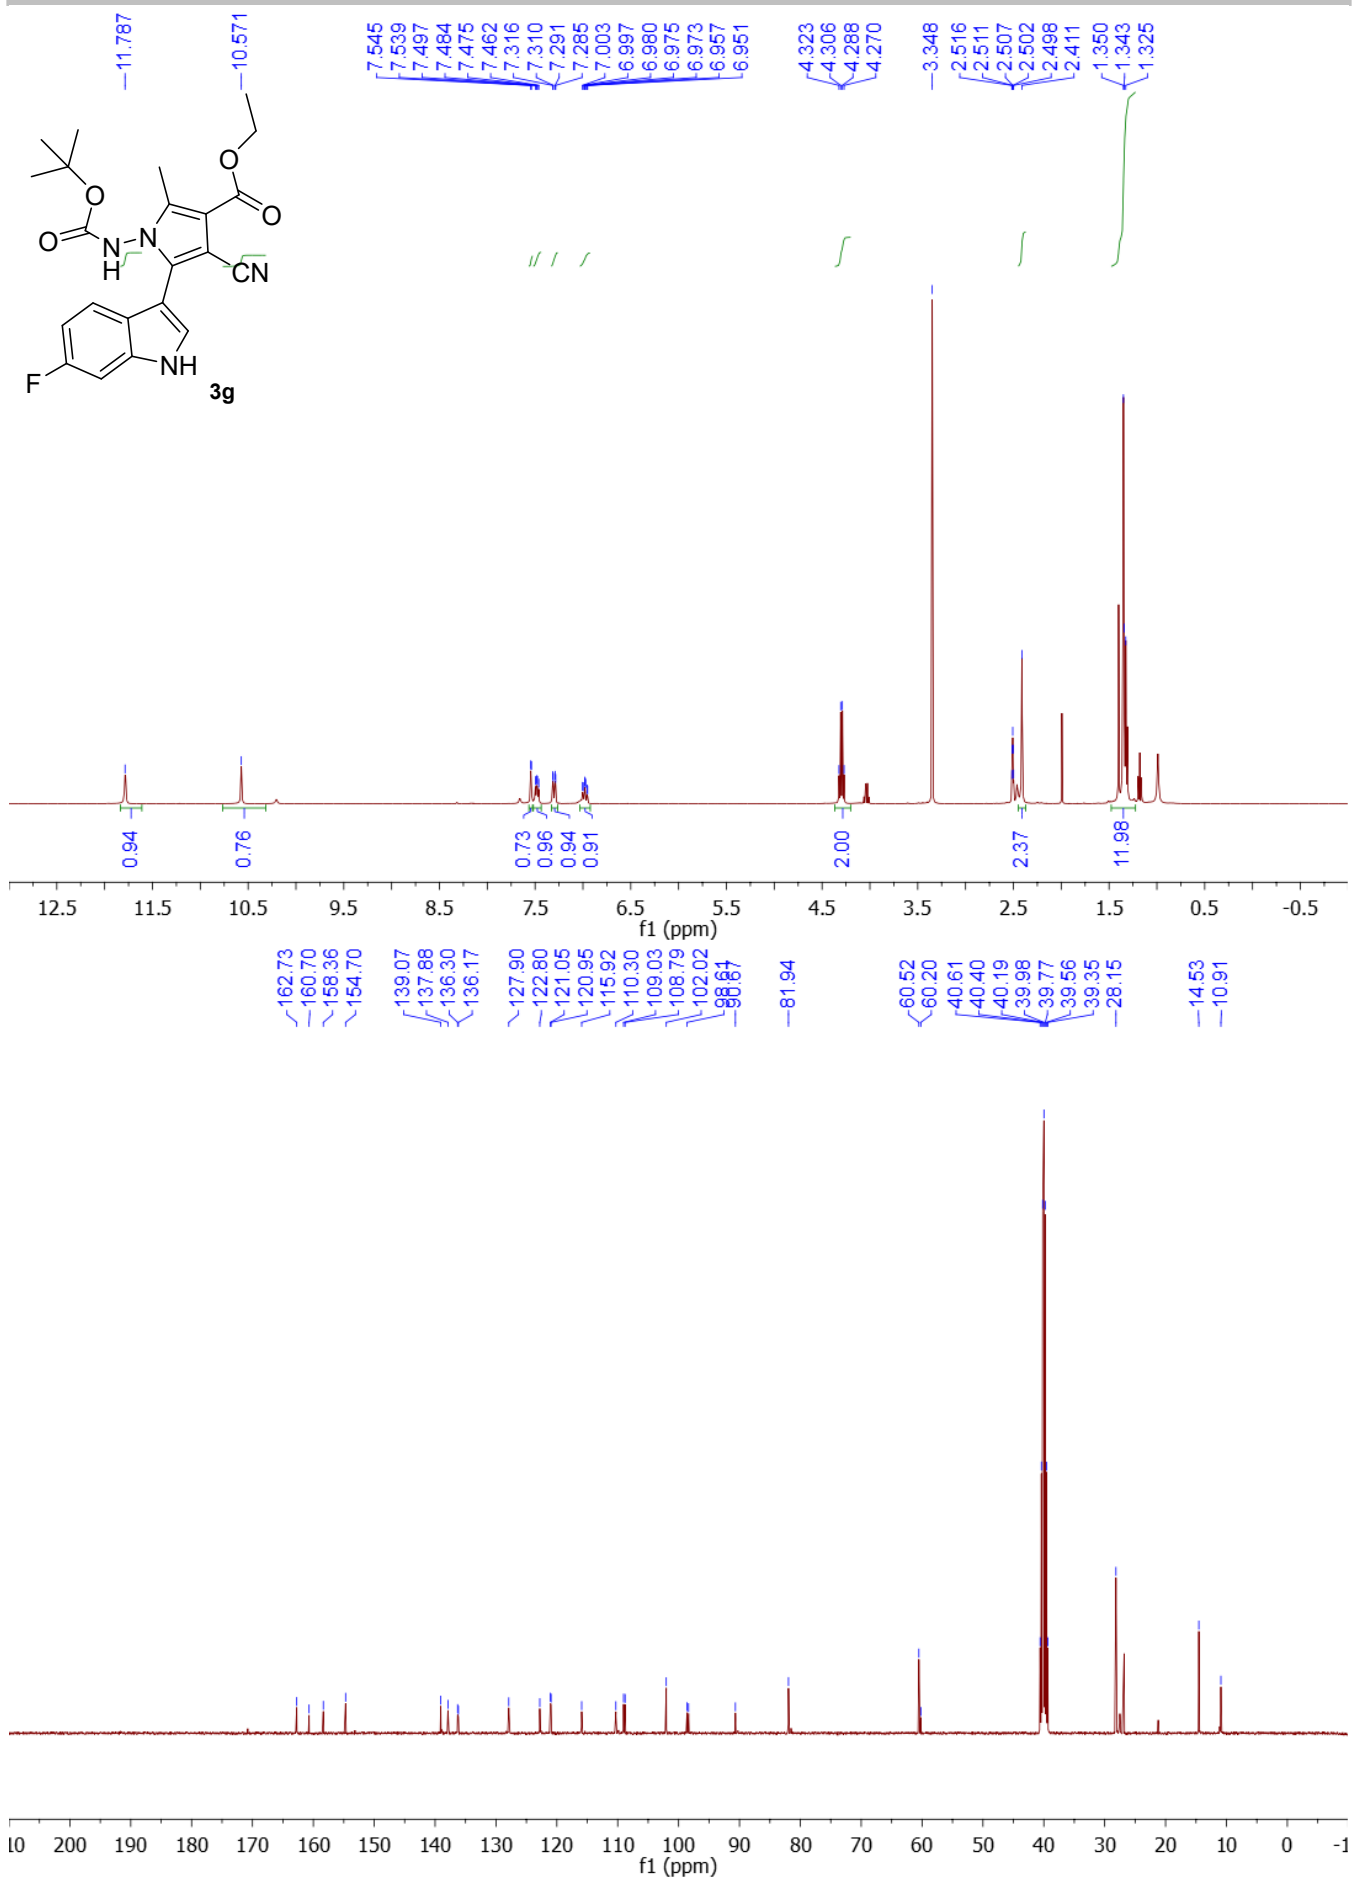

# ELECTRONIC SUPPORTING INFORMATION

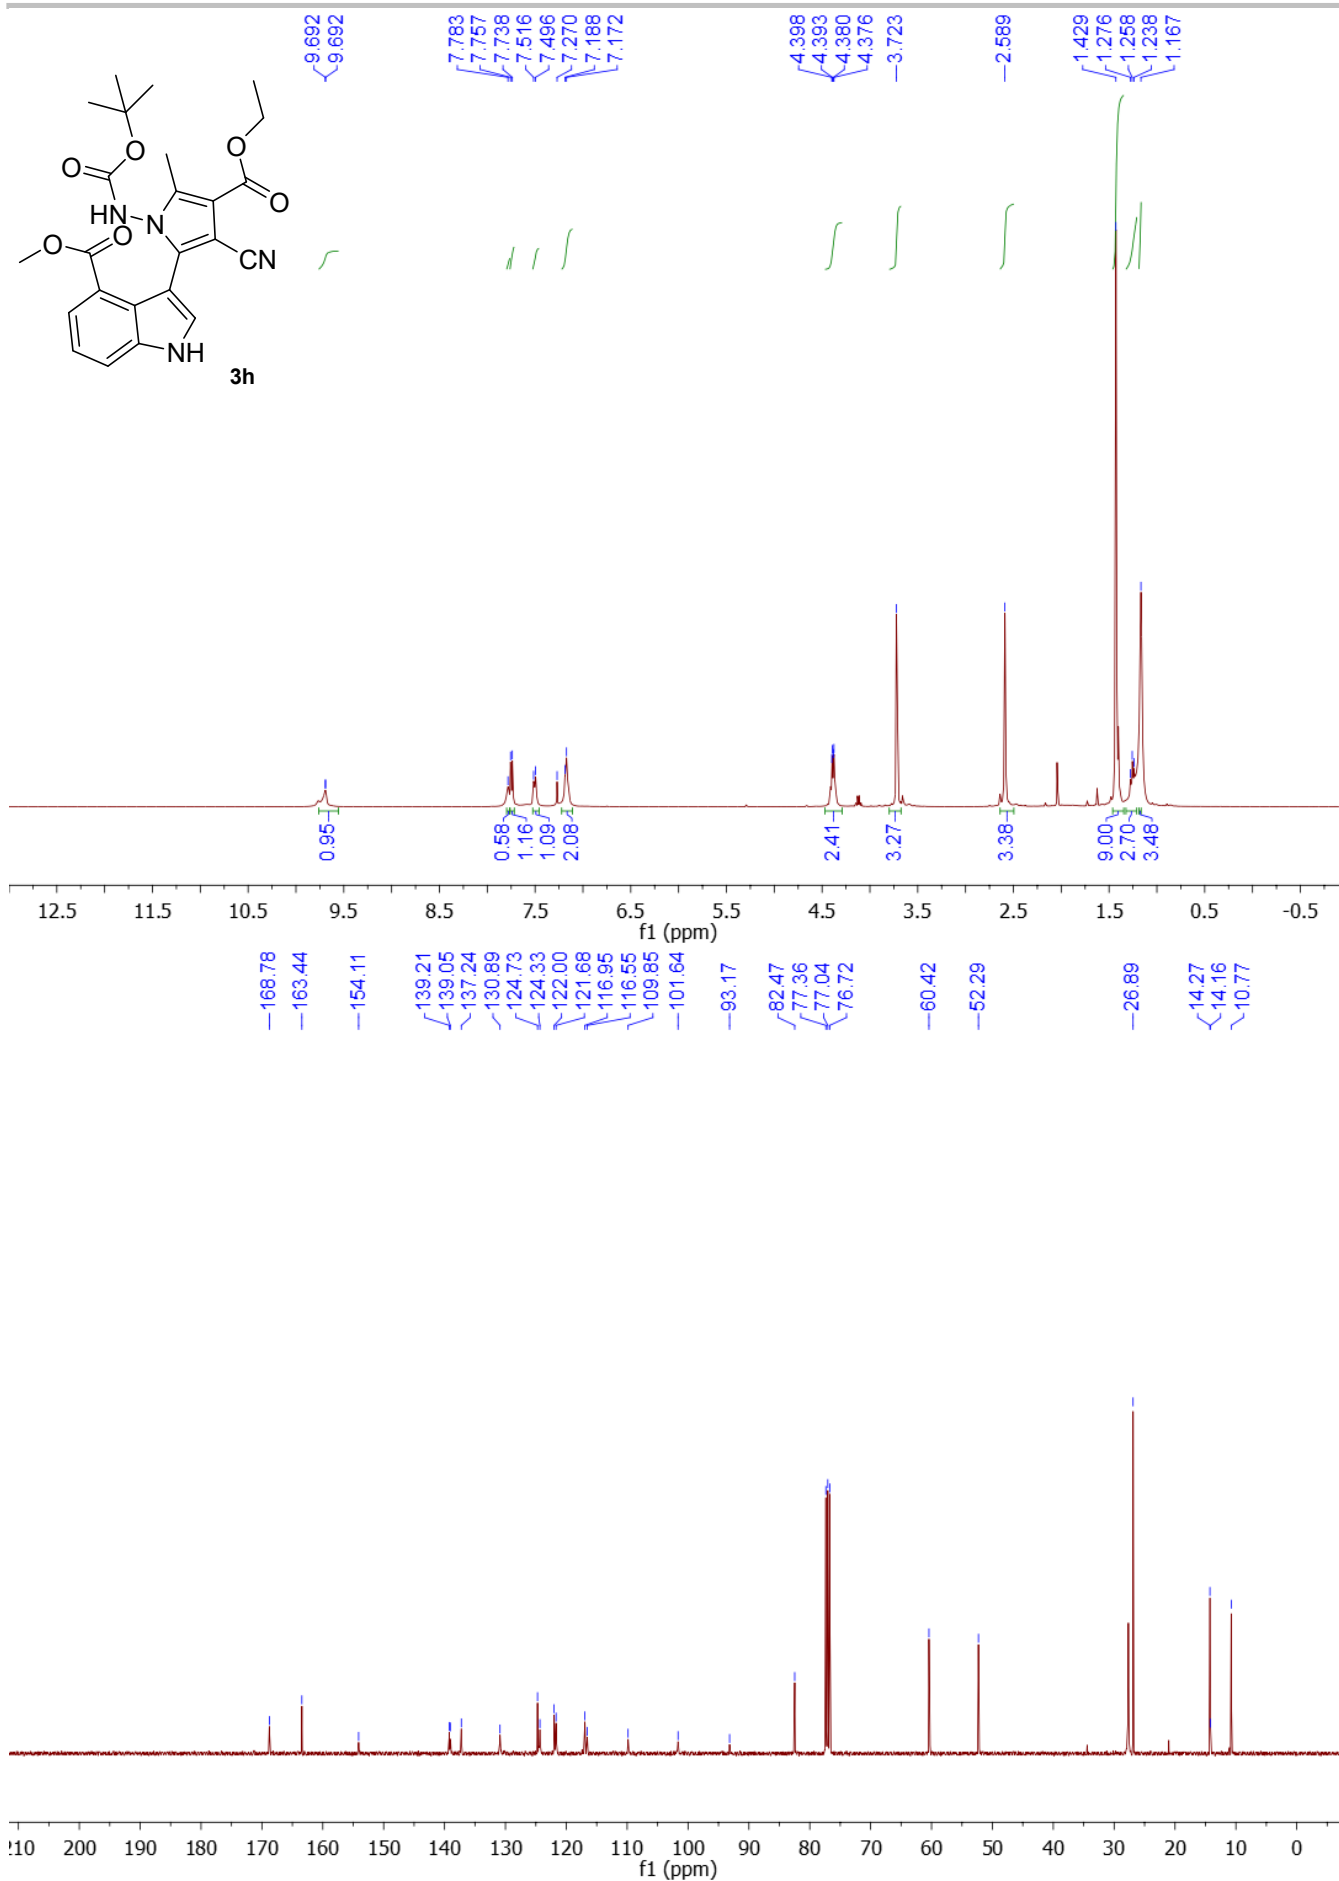

# ELECTRONIC SUPPORTING INFORMATION

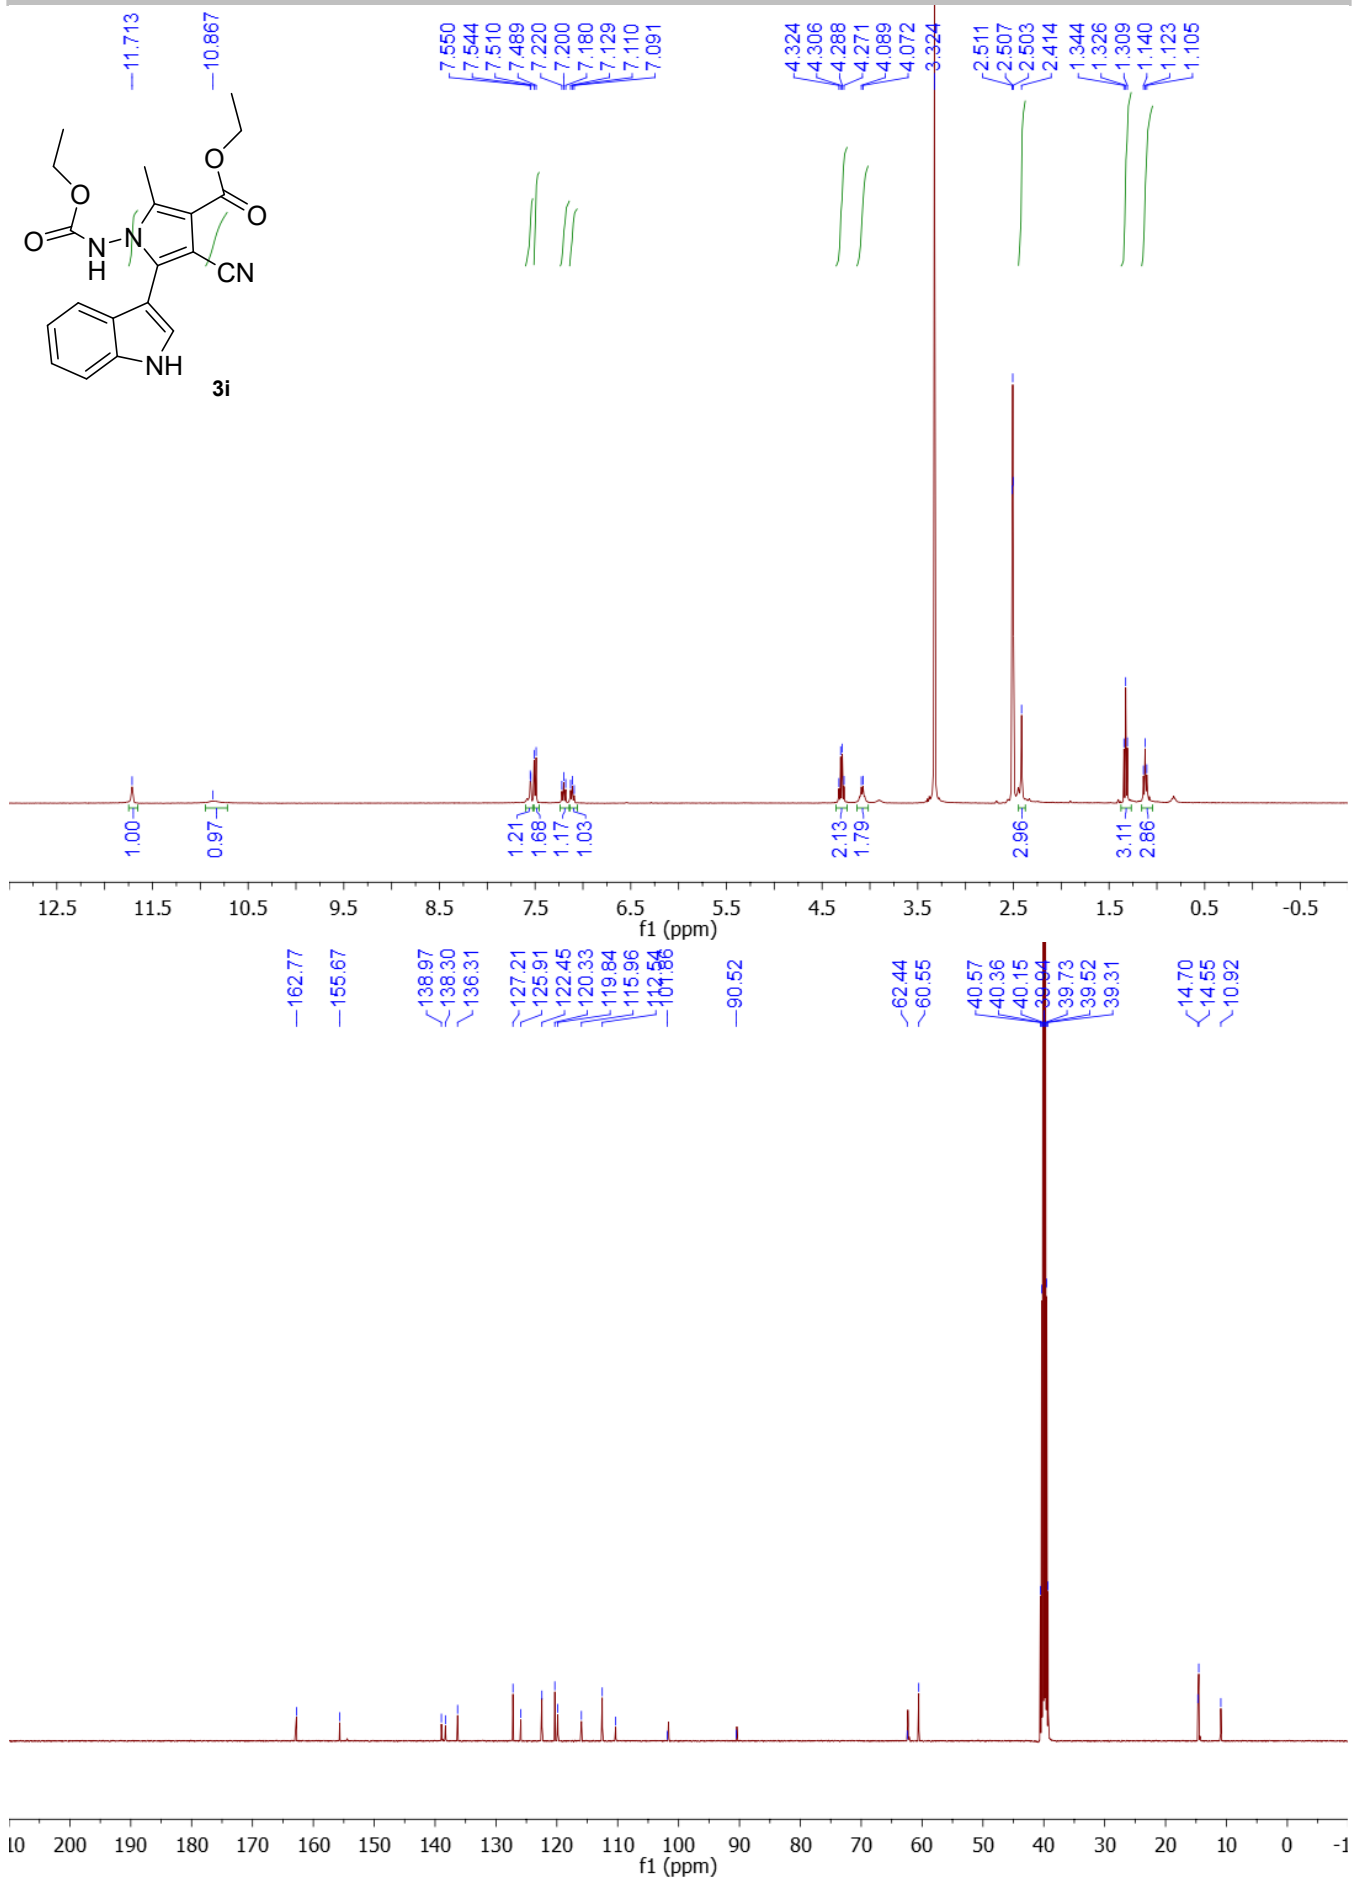

# ELECTRONIC SUPPORTING INFORMATION

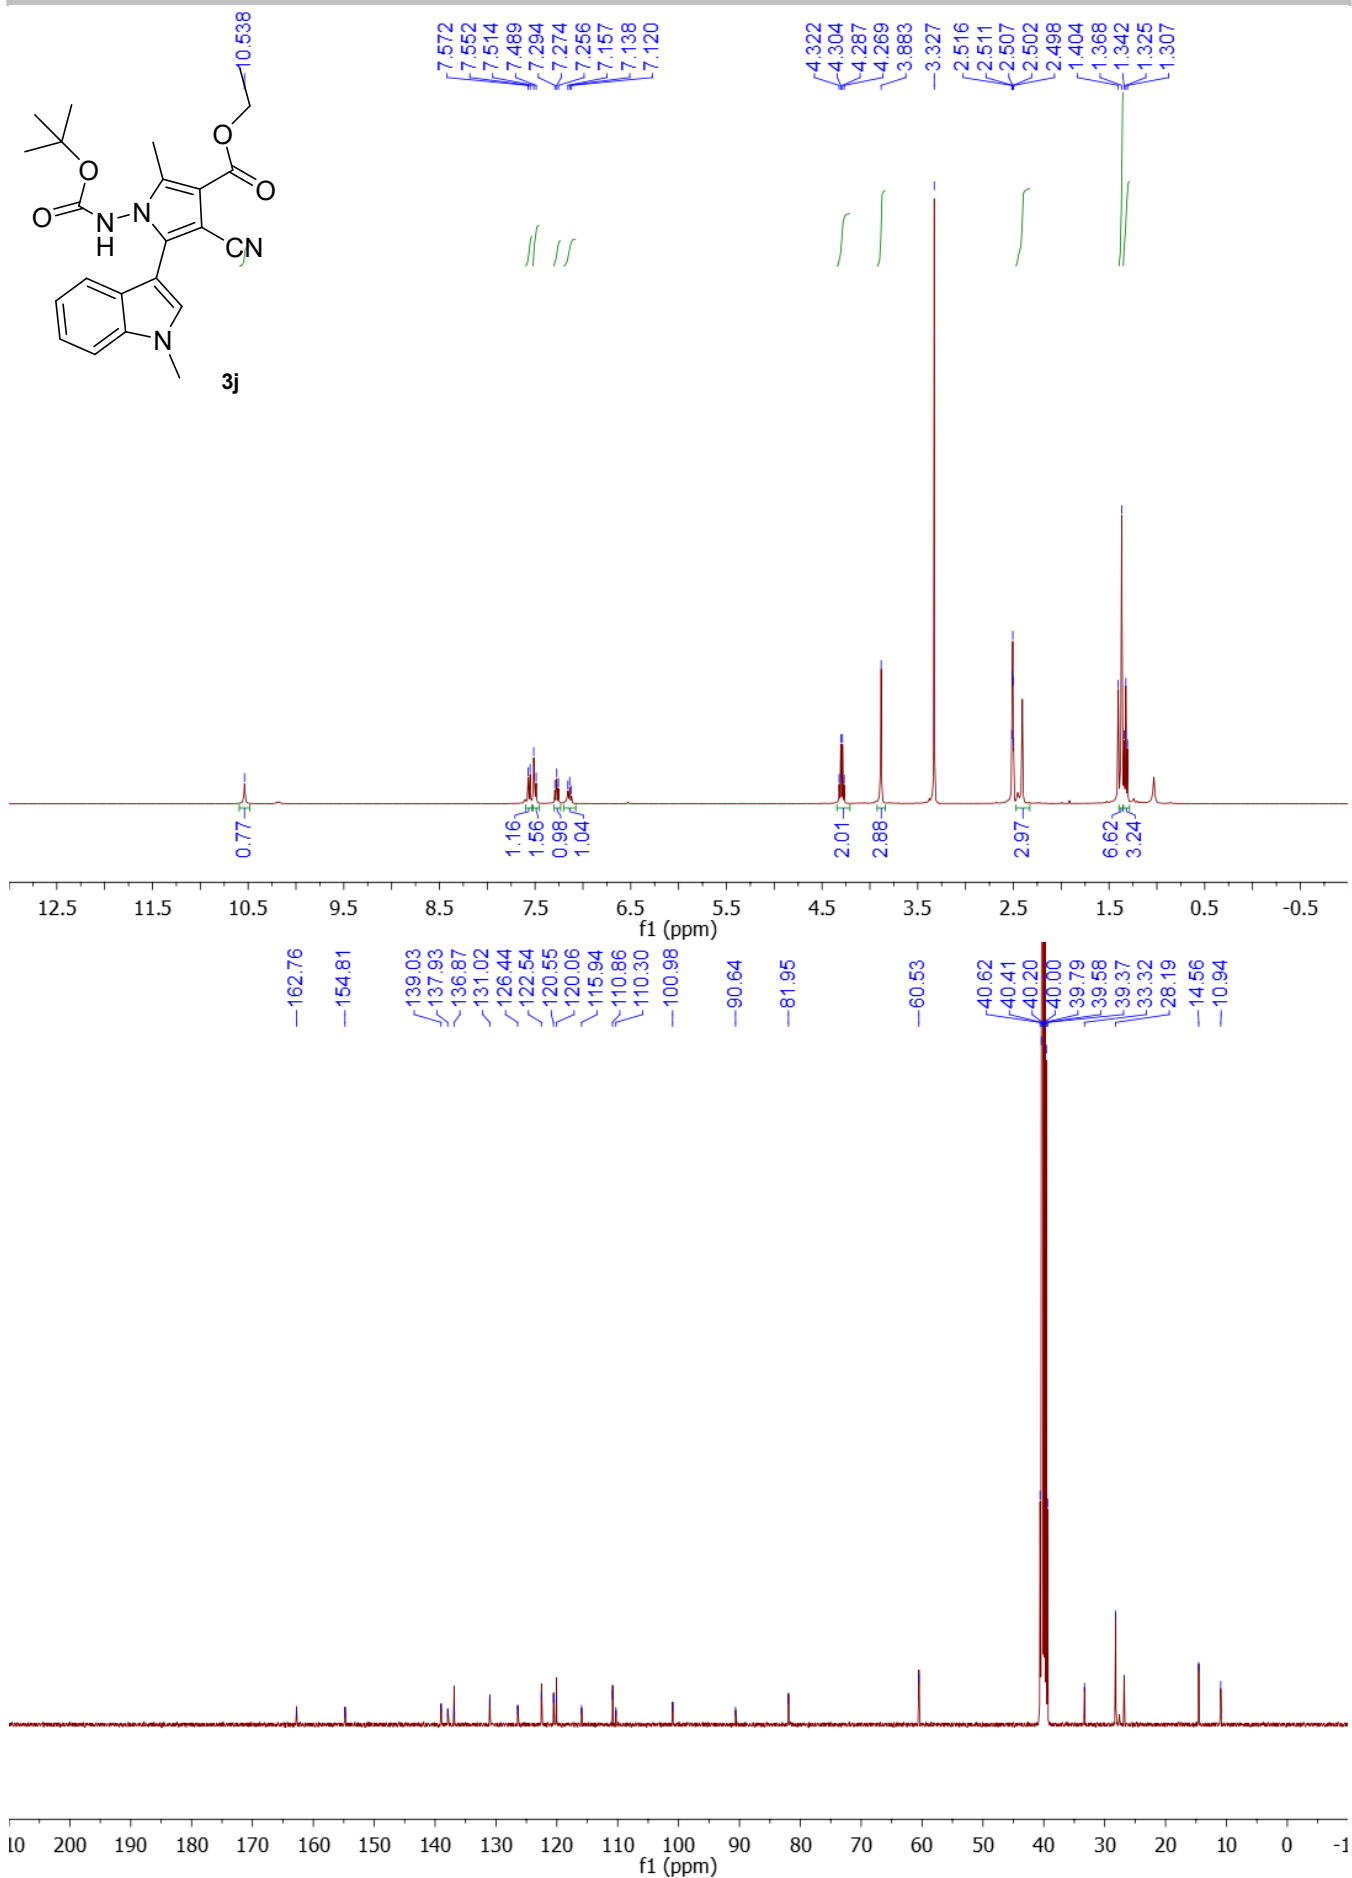

# ELECTRONIC SUPPORTING INFORMATION

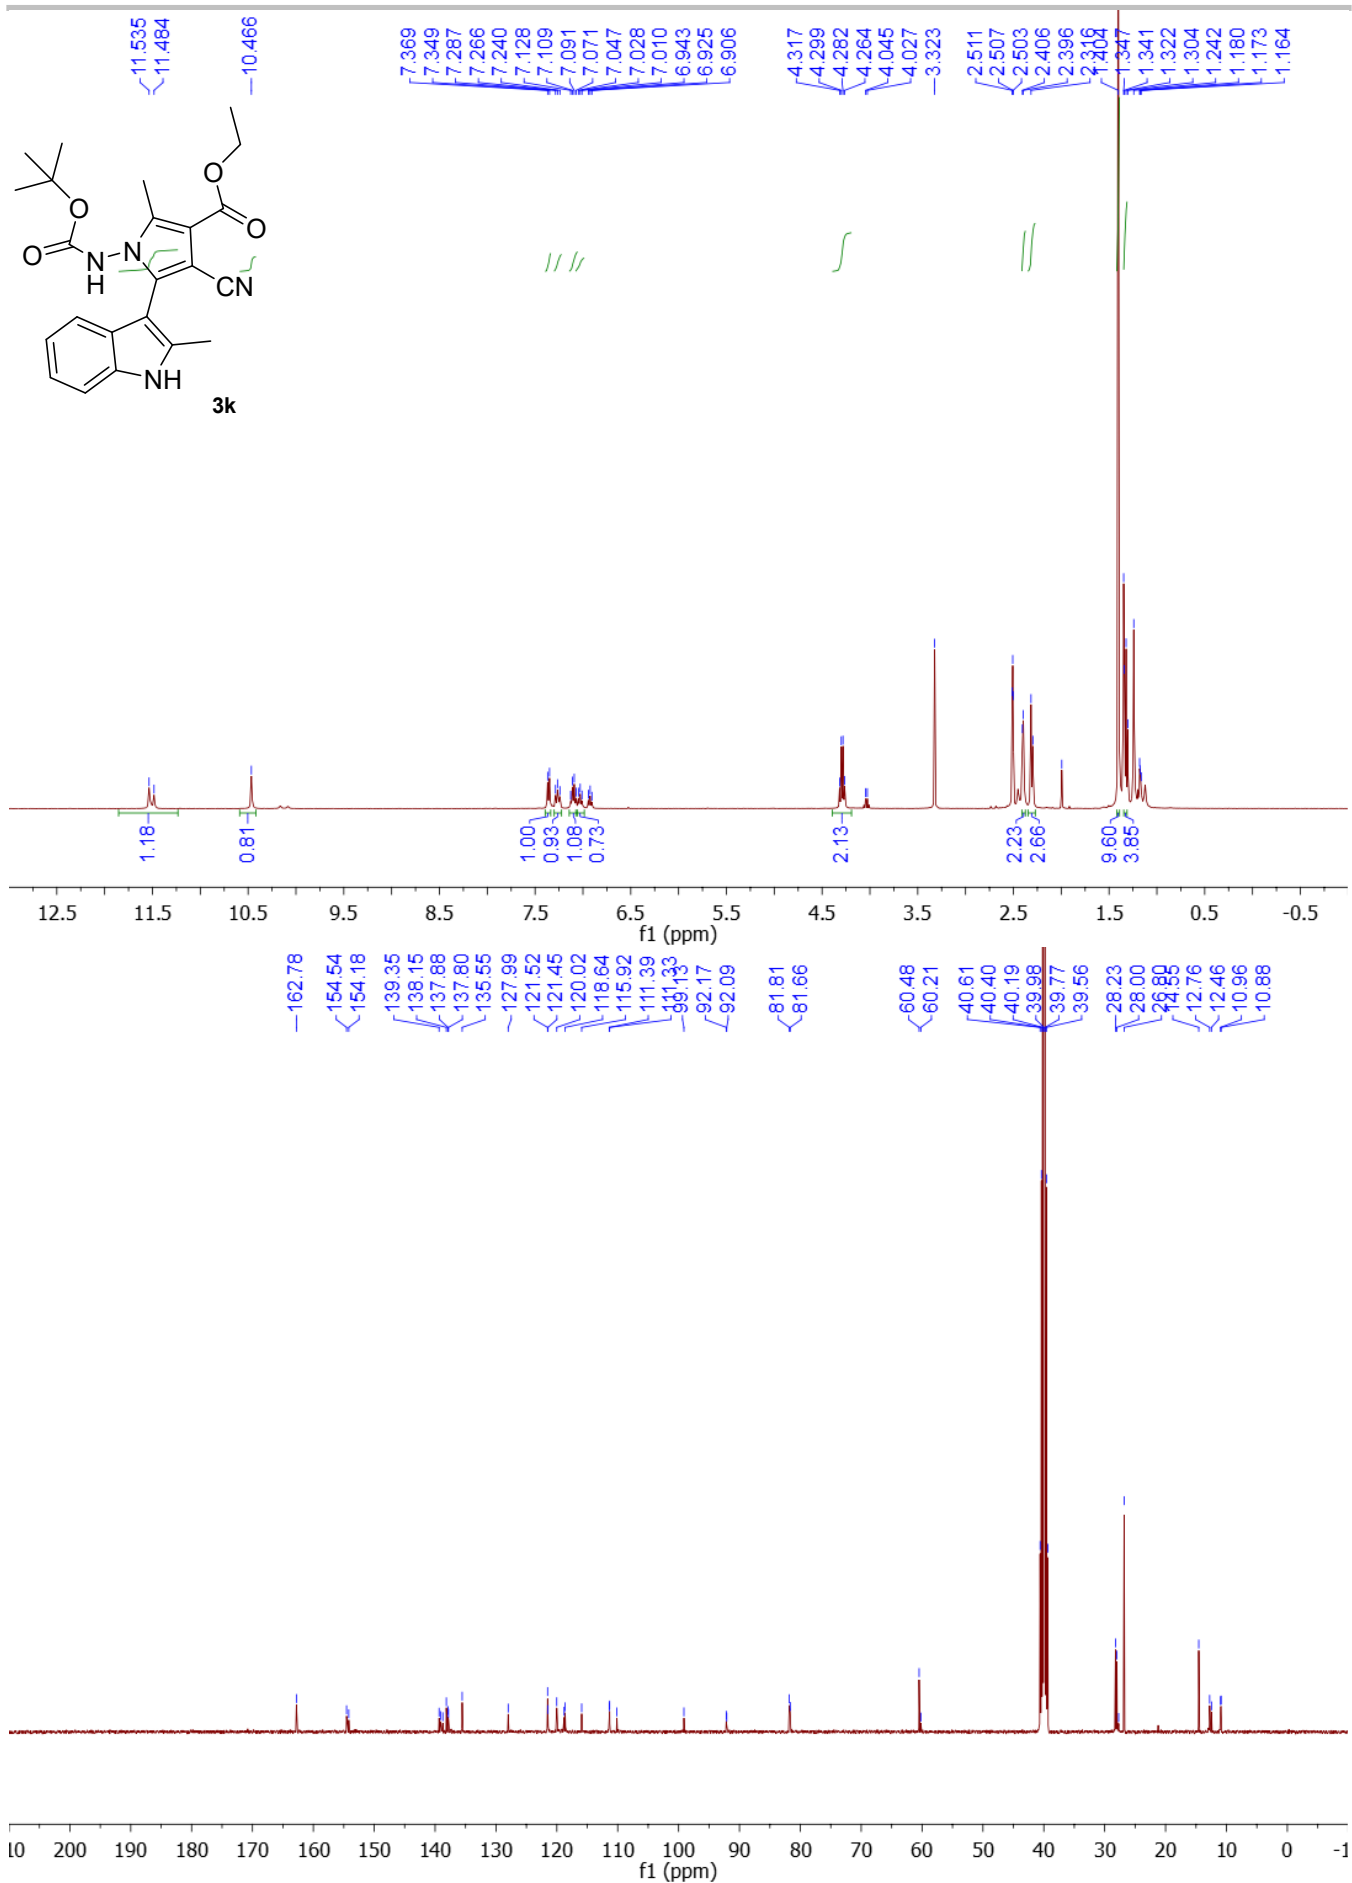

# ELECTRONIC SUPPORTING INFORMATION

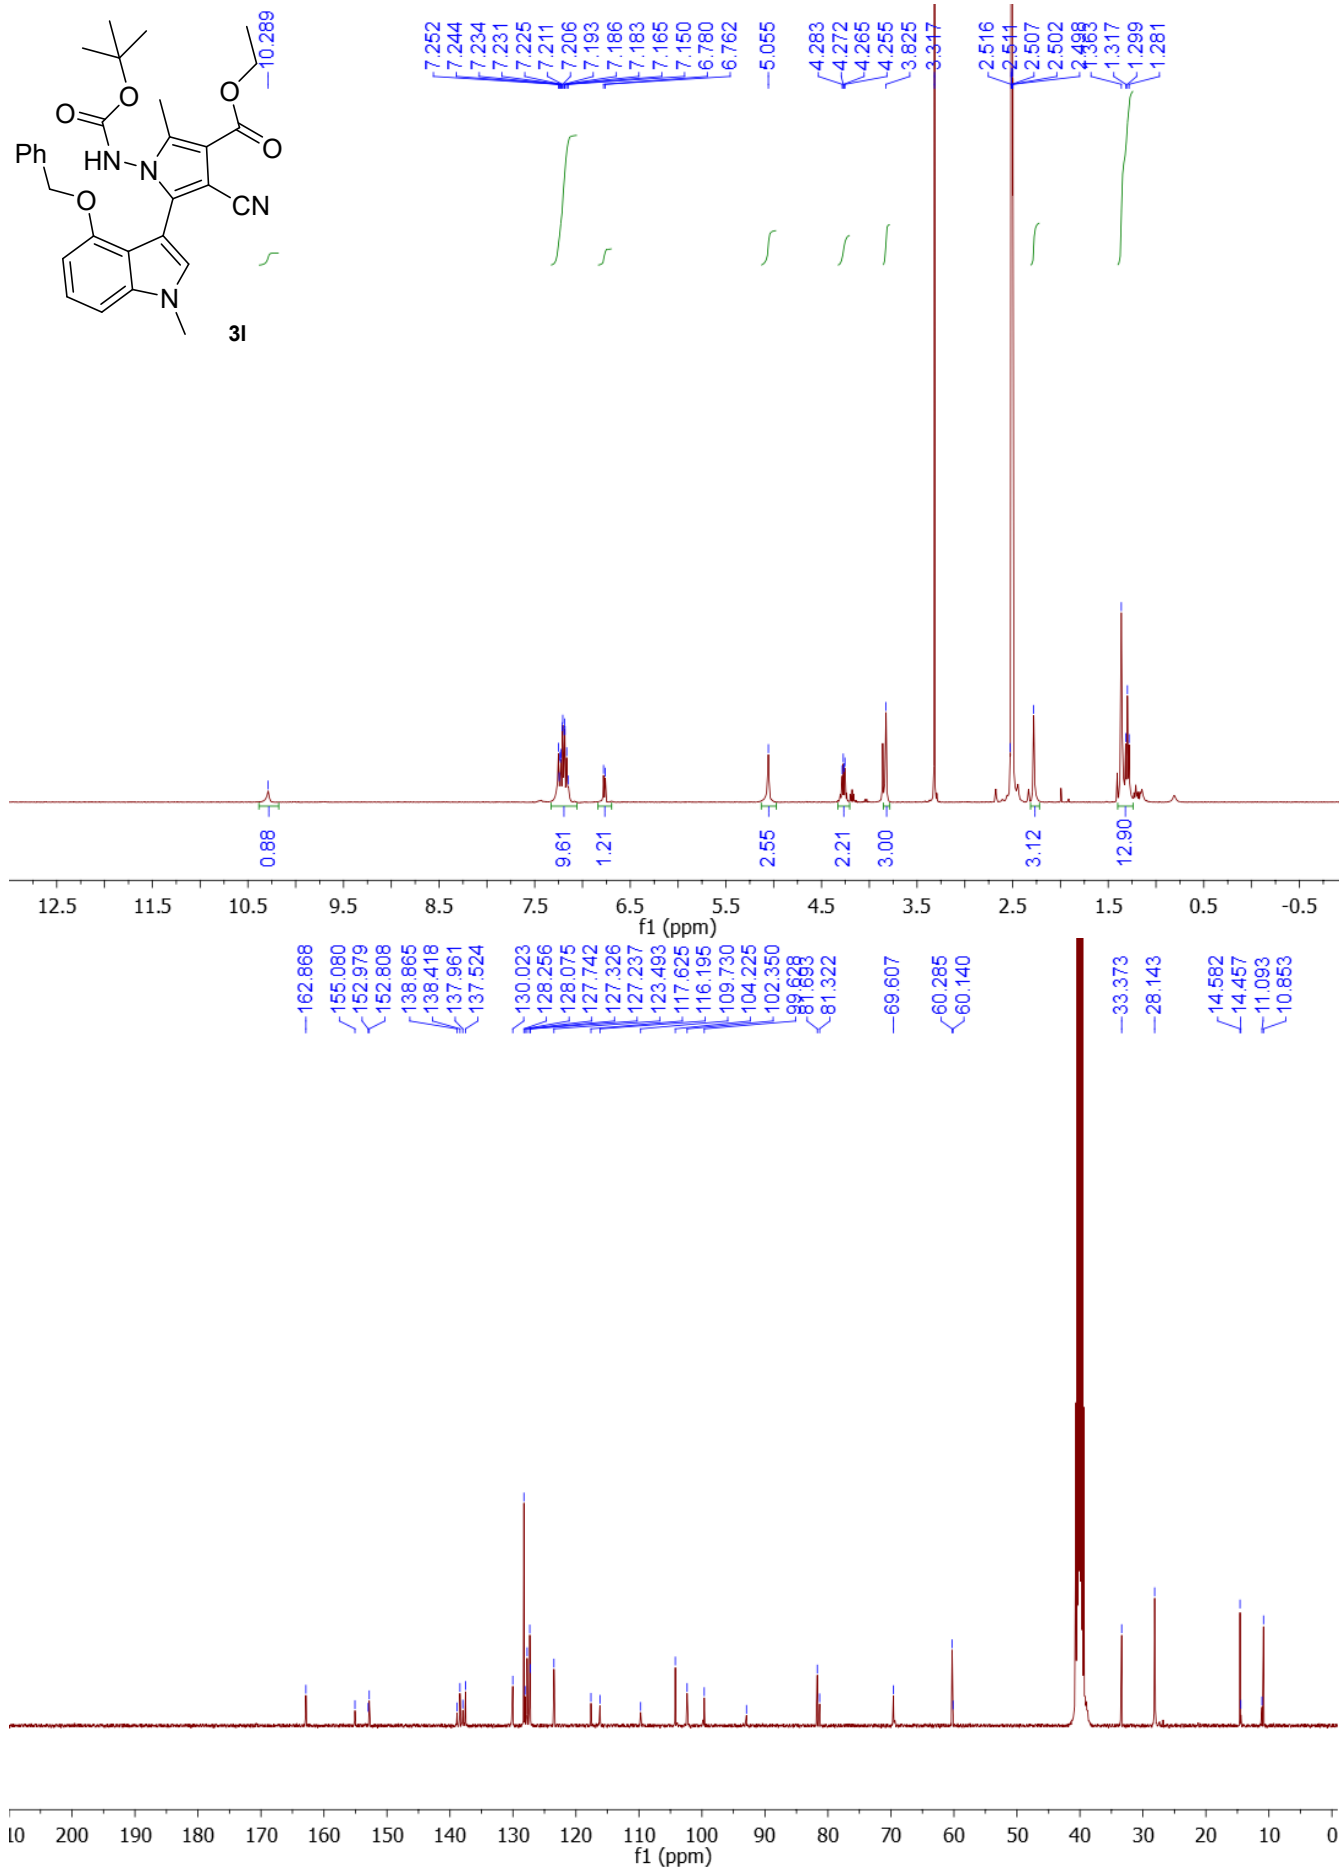

# ELECTRONIC SUPPORTING INFORMATION

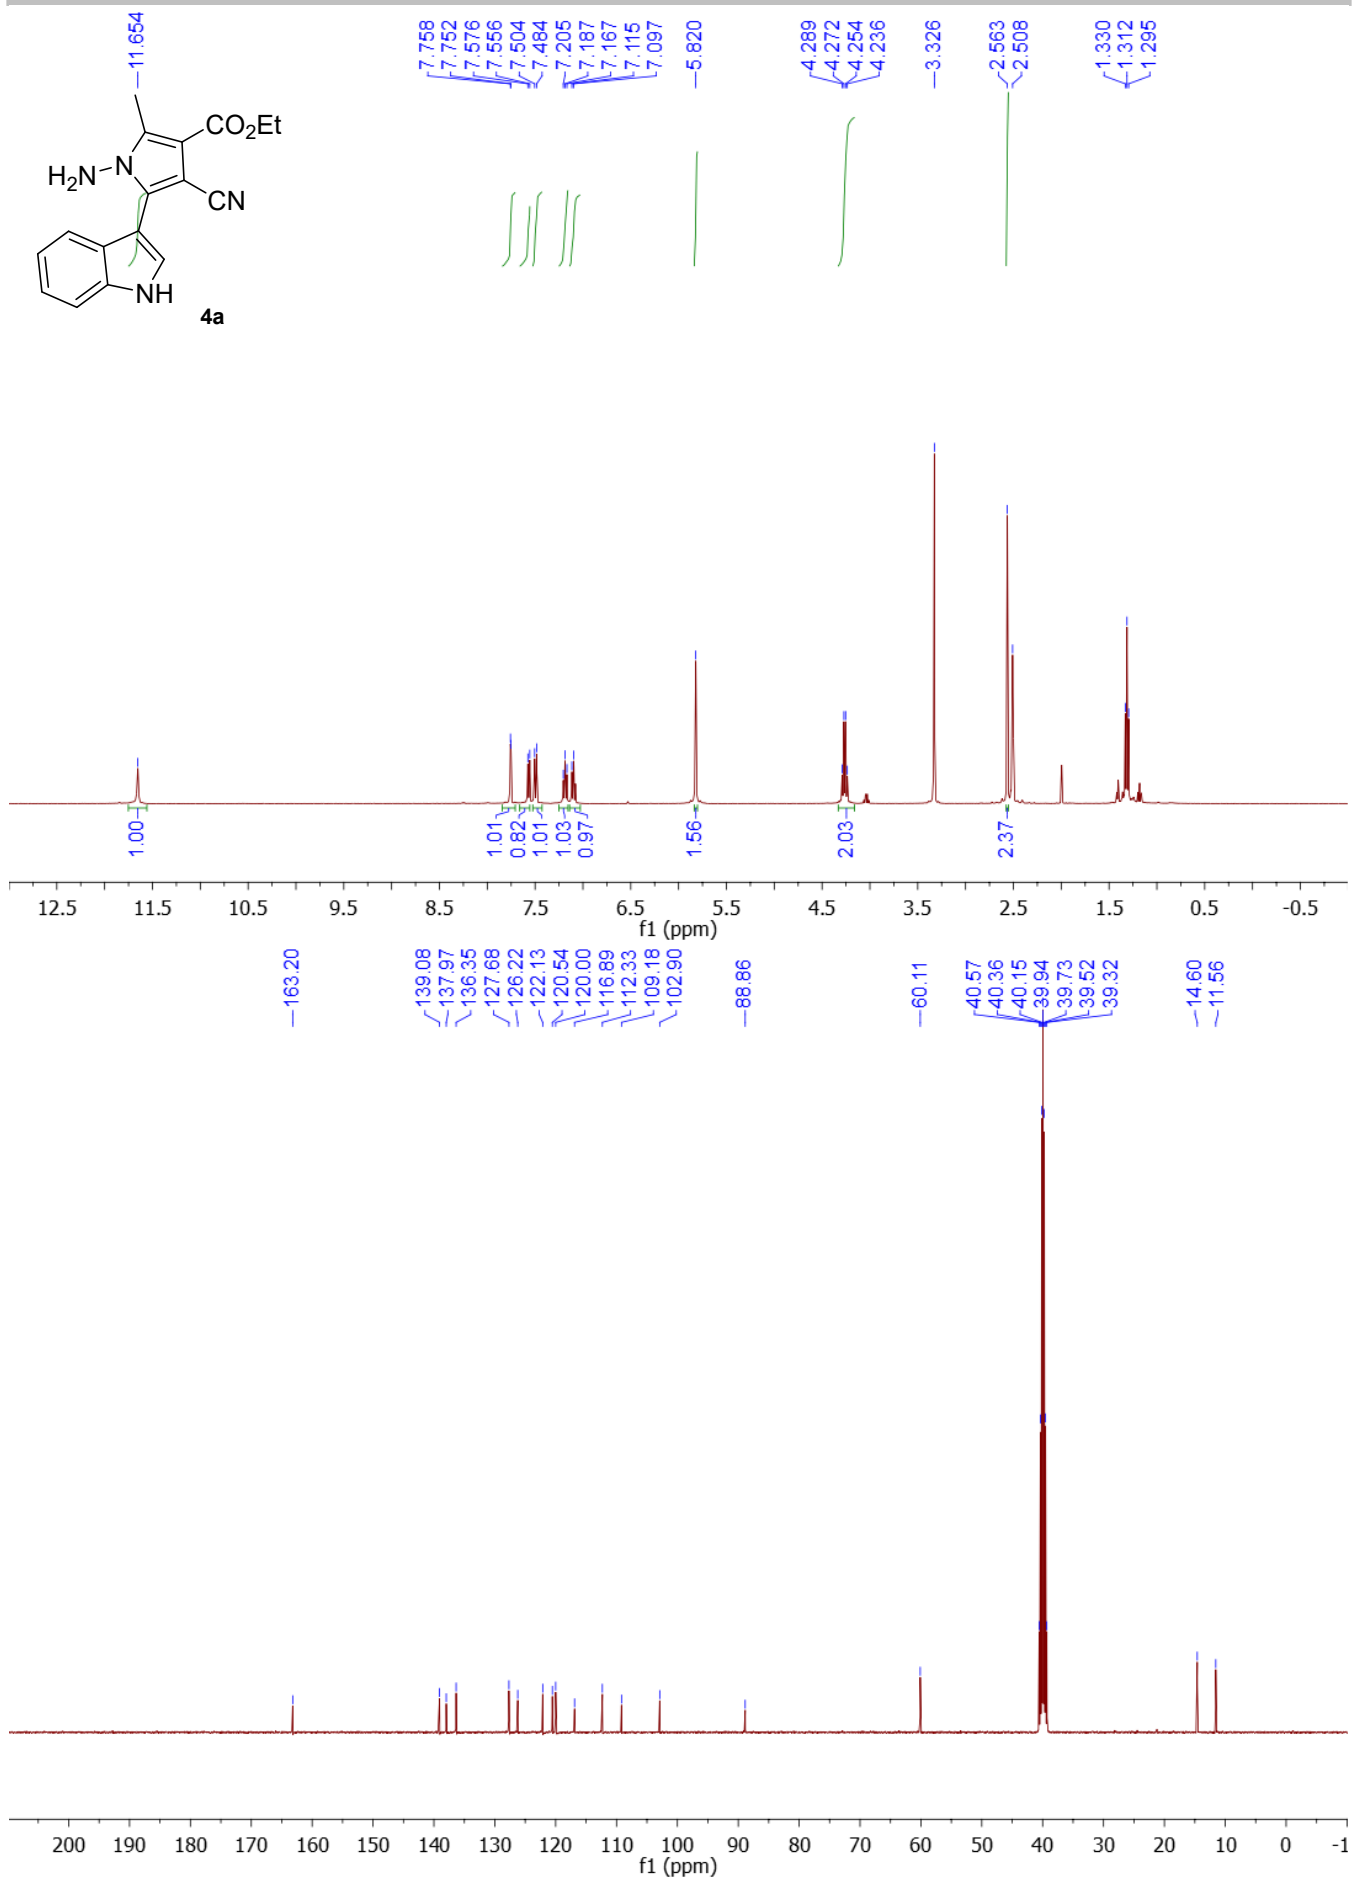



# ELECTRONIC SUPPORTING INFORMATION

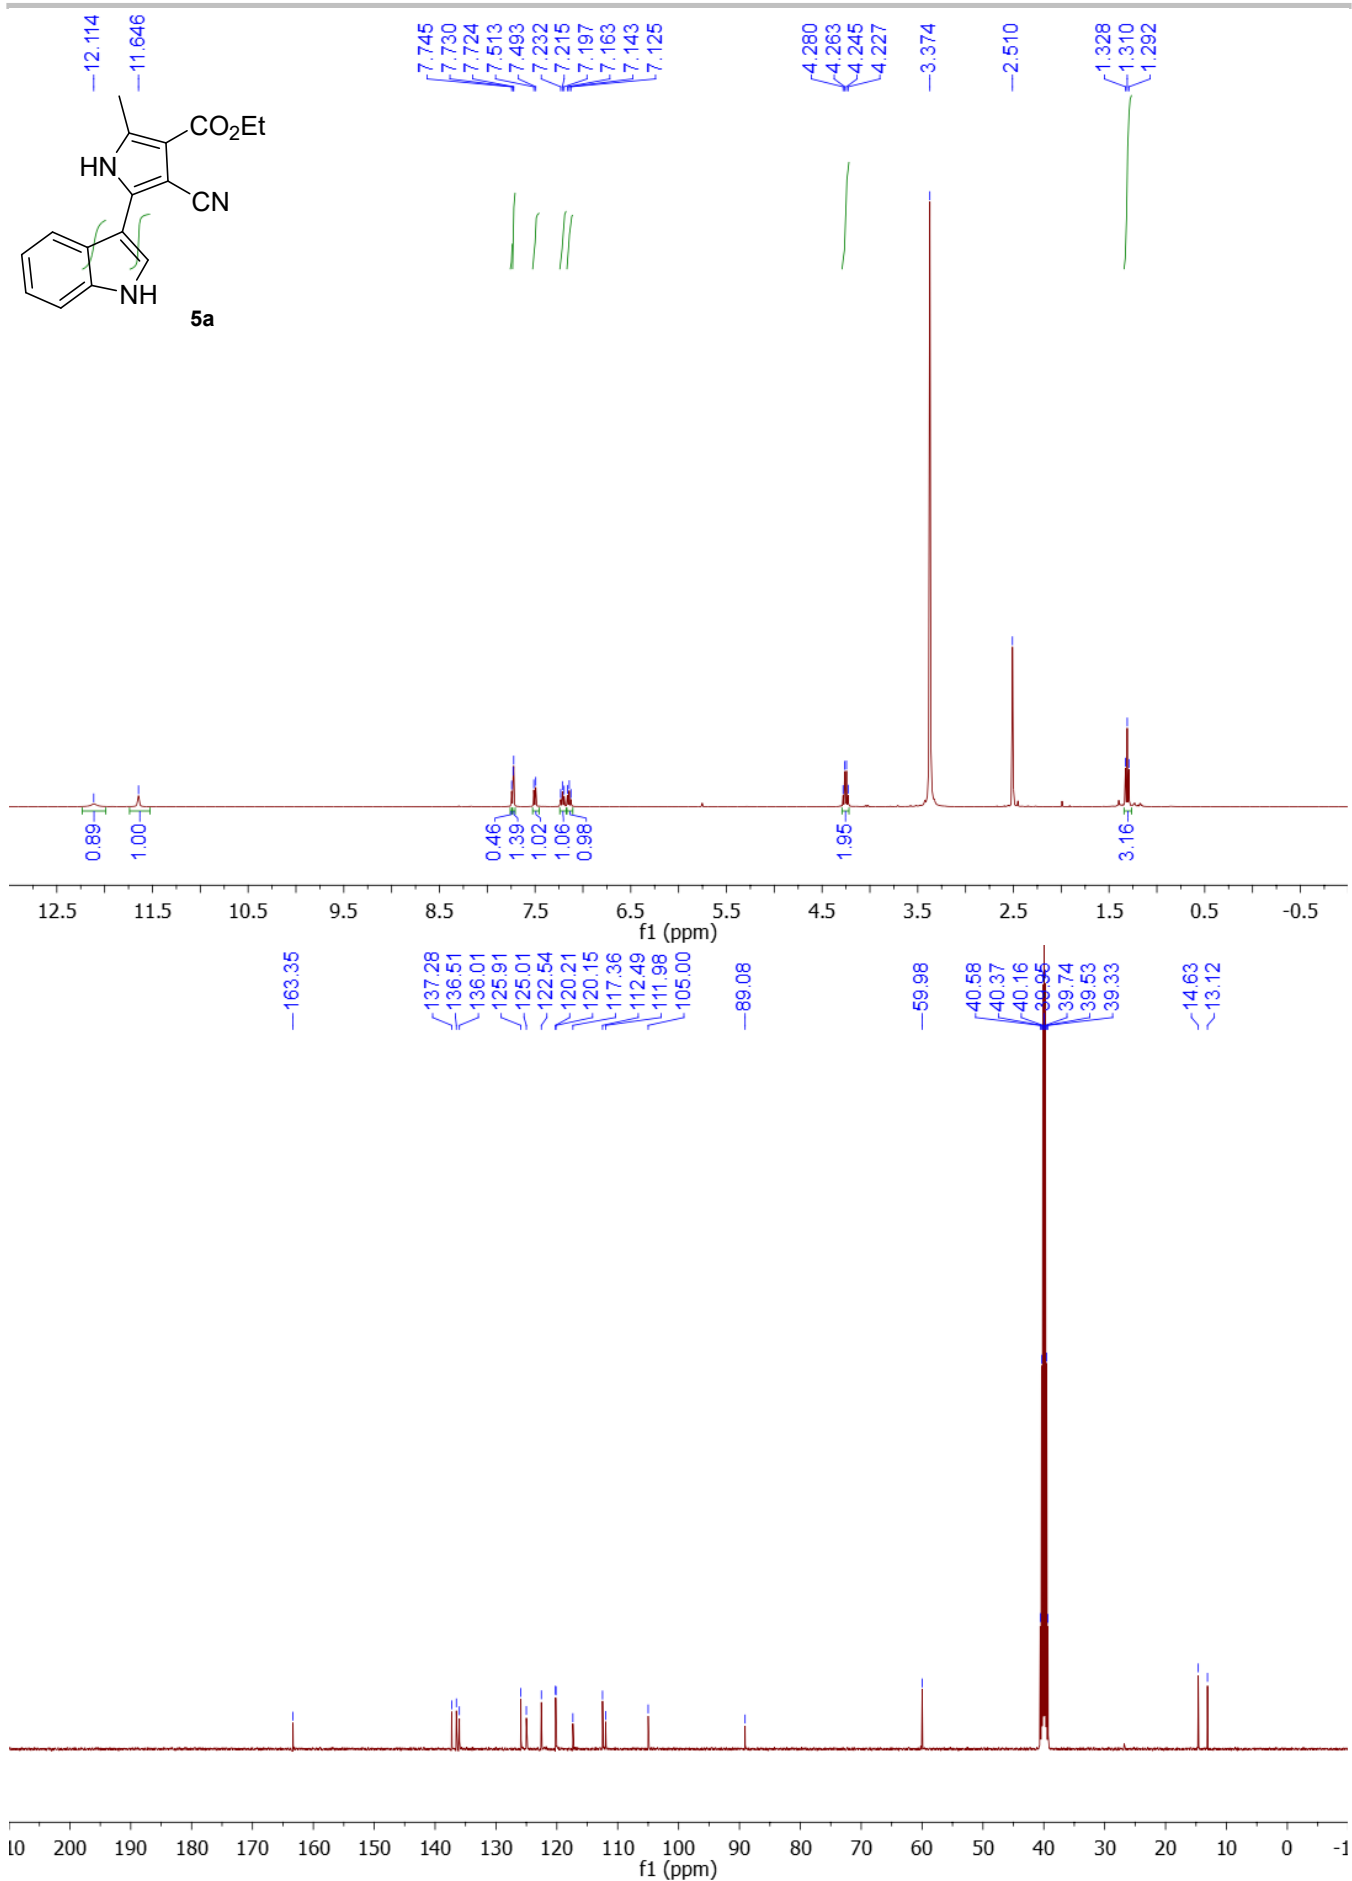

## ELECTRONIC SUPPORTING INFORMATION

### 6. Viability evaluation of compounds **3c**, **3d** and **3j** on *L. infantum* promastigotes

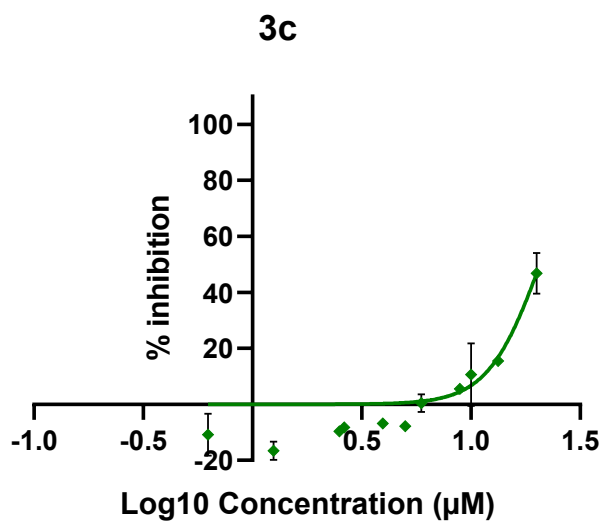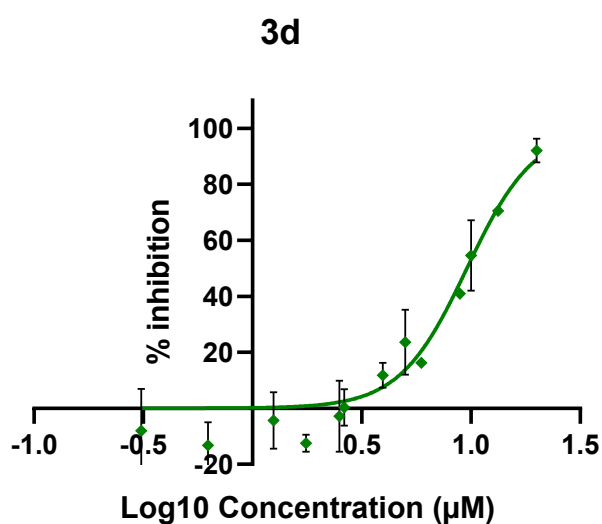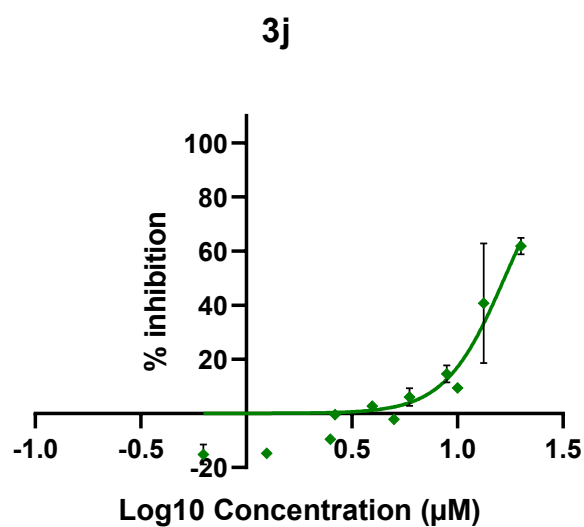

## ELECTRONIC SUPPORTING INFORMATION

### 7. Toxicity evaluation of compounds **3c**, **3d** and **3j** on THP-1 cells

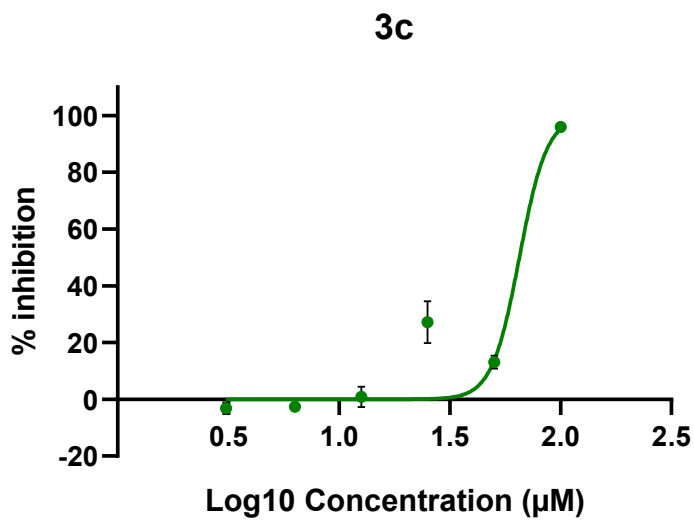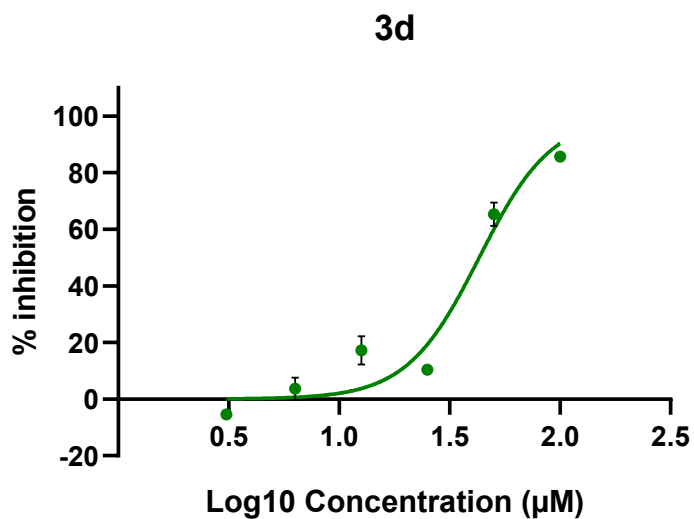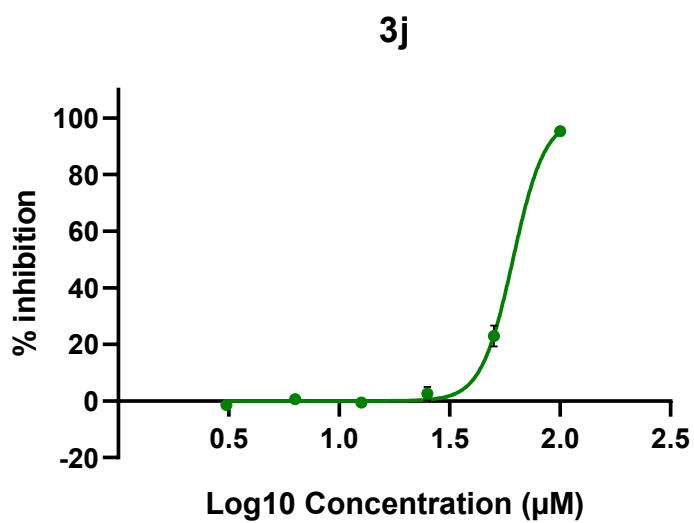

### 8. References

- 1 R. Adepu, J. R. Dhanaji, P. Samatha, P. S. Mainkar and S. Chandrasekhar, *Org. Lett.* 2020, **22**, 8224.
- 2 O. A. Attanasi, P. Filippone, A. Mei, S. Santeusanio, *Synthesis* 1984, 671.
- 3 O. A. Attanasi, P. Filippone, A. Mei, S. Santeusanio, *Synthesis* 1984, 873.
- 4 L. Preti, O. A. Attanasi, E. Caselli, G. Favi, C. Ori, P. Davoli, F. Felluga, F. Prati, *Eur. J. Org. Chem.* 2010, 4312.
- 5 G.-J. Mei, X. Tang, Y. Tasdan and Y. Lu, *Angew. Chem. Int. Ed.*, 2020, **59**, 648.
- 6 P. Magnus, N. Garizi, K. A. Seibert, A. Ornholt, *Org. Lett.* 2009, **11**, 5646.
